# Supplementary material for: In sickness and in health: the dynamics of the fruit bat gut microbiota under a bacterial antigen challenge and its association with the immune response
Source: Front Immunol. 2023 Apr 11;14:1152107. doi: 10.3389/fimmu.2023.1152107 (PMC10126333; doi:10.3389/fimmu.2023.1152107)
Supplement: Supplementary file 1 [file DataSheet_1.xlsx]

## Sheet: Sheet1
Data sheet S1. Description of samples
Green fill	Samples used in analysis
No fill	Samples removed from analysis
	Samples removed after data was rarefied to a minimum sequence depth of 20,000 sequences (alpha diversity)
Sample number	Sample name	Treatment	Time of collection (h)	Bat ID Number	Immune Chalenge round	Weight (g)	Haptoglobin (mg/ml)
1	N69	LPS	0	1	1	144.58	1.99
2	N48	LPS	24	1	1	135.05	9.31
3	N65	LPS	48	1	1	129.67	17.07
4	N77	Control	0	2	1	154.29	2.47
5	N47	Control	24	2	1	160.61	2.4
6	N70	Control	48	2	1	158.39	2.32
7	N73	LPS	0	3	1	160.8	3
8	N58	LPS	24	3	1	155.34	10.21
9	N61	LPS	48	3	1	145.29	15.85
10	N78	LPS	0	4	1	154.42	0.93
11	N63	LPS	24	4	1	148.19	9.04
12	N60	LPS	48	4	1	142.15	14.86
13	N76	Control	0	5	1	150.3	0.96
14	N50	Control	24	5	1	150.26	2.41
15	N28	Control	48	5	1	149.9	2.94
16	N82	LPS	0	6	1	NA	NA
17	N66	LPS	24	6	1	134.35	9.28
18	N62	LPS	48	6	1	132.76	13.84
19	N75	LPS	0	7	1	149.02	0.03
20	N67	LPS	24	7	1	142.07	5.88
21	N59	LPS	48	7	1	137.85	13.27
22	N80	Control	0	8	1	148.76	0.29
23	N54	Control	24	8	1	151.97	0.44
24	N30	Control	48	8	1	149.38	0
25	N74	LPS	0	9	1	157.56	0.02
26	N52	LPS	24	9	1	158.83	3.62
27	N68	LPS	48	9	1	151.44	8.96
28	N71	LPS	0	10	1	158.48	1.86
29	N51	LPS	24	10	1	149.58	6.91
30	N57	LPS	48	10	1	145.46	12.52
31	N72	LPS	0	11	1	176.4	0.11
32	N55	LPS	24	11	1	173.36	6.1
33	N29	LPS	48	11	1	166.28	13.05
34	N79	LPS	0	12	1	127.26	1.84
35	N53	LPS	24	12	1	122	6.48
36	N27	LPS	48	12	1	119.28	16.46
37	N81	Control	0	13	1	156.53	5.62
38	N49	Control	24	13	1	163.24	0.1
39	N56	Control	48	13	1	160	0.31
40	N38	LPS	0	14	2	160.87	0.83
41	N5	LPS	24	14	2	149.28	8.47
42	N14	LPS	48	14	2	147.18	15.12
43	N44	LPS	0	15	2	160.84	0
44	N11	LPS	24	15	2	153.75	7.81
45	N8	LPS	48	15	2	147.36	13.65
46	N45	LPS	0	16	2	162.09	0
47	N24	LPS	24	16	2	153.68	7.09
48	N7	LPS	48	16	2	152.23	15.26
49	N39	Control	0	17	2	178.12	0
50	N2	Control	24	17	2	183.26	0.2
51	N6	Control	48	17	2	181.89	0
52	N41	LPS	0	18	2	154.98	0
53	N17	LPS	24	18	2	148.38	5.92
54	N13	LPS	48	18	2	145.32	10.89
55	N46	LPS	0	19	2	159.45	0.45
56	N15	LPS	24	19	2	149.21	4.92
57	N10	LPS	48	19	2	144.87	7.31
58	N33	LPS	0	20	2	161.8	0
59	N26	LPS	24	20	2	152.79	6.71
60	N4	LPS	48	20	2	152.89	11.71
61	N42	LPS	0	21	2	158.22	2.72
62	N19	LPS	24	21	2	152.09	7.69
63	N37	LPS	48	21	2	152.82	13.78
64	N25	LPS	0	22	2	152.8	1.46
65	N22	LPS	24	22	2	145.67	5.53
66	N1	LPS	48	22	2	149.67	8.23
67	N31	Control	0	23	2	184.07	3.27
68	N21	Control	24	23	2	178.89	0.28
69	N3	Control	48	23	2	180	0.92
70	N40	LPS	0	24	2	161.26	0.43
71	N18	LPS	24	24	2	155.4	7.33
72	N20	LPS	48	24	2	149.85	15.95
73	N43	LPS	0	25	2	154.45	0.28
74	N23	LPS	24	25	2	145.69	8.13
75	N9	LPS	48	25	2	145.95	16.65
76	N34	LPS	0	26	2	163.42	NA
77	N12	LPS	24	26	2	158.06	6.05
78	N16	LPS	48	26	2	156.87	14.17
