# Supplementary material for: In sickness and in health: the dynamics of the fruit bat gut microbiota under a bacterial antigen challenge and its association with the immune response
Source: Front Immunol. 2023 Apr 11;14:1152107. doi: 10.3389/fimmu.2023.1152107 (PMC10126333; doi:10.3389/fimmu.2023.1152107)
Supplement: Supplementary file 5 [file DataSheet_5.xlsx]

## Sheet: LDM_tests_global_AV_Rarefied_re
Data sheet S5. Linear decomposition model (LDM) global results
	freq	tran	pa	omni	omni3
Time	0.00939812	0.00179964	0.00059988	0.00219956	0.00079984
Treatment	0.1494	0.0836	0.0786	0.1078	0.014797
Time*Treatment	0.0131974	0.00679864	0.1504	0.00839832	0.0185963
