# Supplementary material for: In sickness and in health: the dynamics of the fruit bat gut microbiota under a bacterial antigen challenge and its association with the immune response
Source: Front Immunol. 2023 Apr 11;14:1152107. doi: 10.3389/fimmu.2023.1152107 (PMC10126333; doi:10.3389/fimmu.2023.1152107)
Supplement: Supplementary file 6 [file DataSheet_6.xlsx]

## Sheet: Table S6
Table S6. Linear decomposition model (LDM) PremanovaFL test results
Statistic	PremanovaFL	Covariate (cov)
F.statistics.cov1	4.90516	Time
F.statistics.cov2	4.84448	Treatment
F.statistics.cov3	4.02025	Time*Treatment
R.squared.cov1	0.141075	Time
R.squared.cov2	0.13933	Treatment
R.squared.cov3	0.115624	Time*Treatment
p.permanova.cov1	0.00019996	Time
p.permanova.cov2	0.00019996	Treatment
p.permanova.cov3	0.00039992	Time*Treatment
n.perm.completed	5000	n.prem
permanova.stopped	0	pstop
seed	15326	seed
