# Supplementary material for: In sickness and in health: the dynamics of the fruit bat gut microbiota under a bacterial antigen challenge and its association with the immune response
Source: Front Immunol. 2023 Apr 11;14:1152107. doi: 10.3389/fimmu.2023.1152107 (PMC10126333; doi:10.3389/fimmu.2023.1152107)
Supplement: Supplementary file 7 [file DataSheet_7.xlsx]

## Sheet: LDM_tests_ASV_Rarified_results
Table S7. Linear decomposition model (LDM) results for the most prevalent ASVs (>60% of samples). The analysis was performed using rarified reads (i.e., relative abundance)
							Mean relative abundance
							Control						Immune-challenged
							0h		24h		48h		0h		24h		48h		Linear decomposition model (LDM) results
ASV_ID	Phylum	Class	Order	Family	Genus	Species	Mean	SE	Mean	SE	Mean	SE	Mean	SE	Mean	SE	Mean	SE	Time_p.otu.omni3	Treatment_p.otu.omni3	Time*Treatment_p.otu.omni3	Time_q.otu.omni3	Treatment_q.otu.omni3	Time*Treatment_q.otu.omni3	Time_p.otu.omni	Treatment_p.otu.omni	Time*Treatment_p.otu.omni	Time_q.otu.omni	Treatment_q.otu.omni	Time*Treatment_q.otu.omni	Time_p.otu.pa	Treatment_p.otu.pa	Time*Treatment_p.otu.pa	Time_q.otu.pa	Treatment_q.otu.pa	Time*Treatment_q.otu.pa	Time_p.otu.tran	Treatment_p.otu.tran	Time*Treatment_p.otu.tran	Time_q.otu.tran	Treatment_q.otu.tran	Time*Treatment_q.otu.tran
ASV0001	Proteobacteria	Gammaproteobacteria	Enterobacterales	Enterobacteriaceae	Escherichia-Shigella	coli	0.0151454	0.00659643	0.00667136	0.00544127	0.0195979	0.00341796	0.00745216	0.00239442	0.0180472	0.00273865	0.0187073	0.0021767	0.00790837	0.768	0.03575	0.0283603	0.761054	0.457842	0.00436324	0.543	0.0183333	0.0251009	0.677414	0.468103	0.624	0.513	0.132	0.532281	0.746705	0.535795	0.00363603	0.508	0.0155714	0.0203982	0.625797	0.38319
ASV0002	Firmicutes	Clostridia	Clostridiales	Clostridiaceae	Clostridium sensu stricto 1	butyricum	0.0228901	0.0135939	0.00596587	0.00285454	0.00855024	0.00489992	0.0376047	0.0264008	0.00324872	0.00149049	0.00476795	0.00313385	0.351	0.581	0.14	0.257466	0.736205	0.691532	0.885	0.837	0.0895	0.465329	0.758931	0.828532	0.196	0.36	0.276	0.255186	0.676482	0.616606	0.825	0.97	0.081	0.441722	0.772419	0.689039
ASV0003	Proteobacteria	Gammaproteobacteria	Enterobacterales	Erwiniaceae	Tatumella	punctata	0.0128503	0.0124006	0.000109616	0.000109616	0.0374886	0.0201649	0.0137937	0.00689399	0.0190553	0.00948087	0.00816911	0.00352088	0.126	0.0111111	0.00468182	0.134065	0.149592	0.21676	0.082	0.00561111	0.00291429	0.109855	0.199301	0.173624	0.808	0.432	0.1	0.609385	0.718729	0.535795	0.197	0.019	0.00217021	0.192157	0.22625	0.16588
ASV0004	Firmicutes	Bacilli	Lactobacillales	Lactobacillaceae	Weissella	cibaria	0.0249598	0.0159436	0.0498749	0.0154401	0.00777638	0.00532281	0.0216107	0.0071588	0.00162667	0.00151761	0.00642933	0.00207933	0.249	0.684	0.0625	0.209647	0.761054	0.540826	0.353	0.839	0.0373333	0.257632	0.758931	0.667259	0.123	0.405	0.645	0.20561	0.718729	0.716393	0.303	0.927	0.03075	0.246293	0.763736	0.588554
ASV0005	Proteobacteria	Gammaproteobacteria	Burkholderiales	Neisseriaceae	NA	NA	0.00197239	0.00197239	0.00147929	0.00147929	0.103057	0.0825964	0.00280941	0.00130871	0.00571826	0.00222385	0.0127045	0.00550209	0.066	0.22	0.639	0.091292	0.544472	0.805463	0.047	0.153	0.477	0.0753525	0.462055	0.828532	0.128	0.316	0.928	0.20561	0.635063	0.82532	0.03275	0.106	0.379	0.0608763	0.3881	0.760366
ASV0006	Firmicutes	Bacilli	Lactobacillales	Streptococcaceae	Streptococcus	NA	0.00284951	0.00128949	0.000444969	0.000444969	0.0309596	0.0227078	0.0298754	0.0159786	0.00761381	0.00520568	0.00924469	0.00375045	0.0396667	0.026	0.322	0.0677774	0.257387	0.771493	0.0244	0.0168571	0.209	0.0551414	0.237551	0.828532	0.123	0.03525	0.766	0.20561	0.282473	0.777564	0.0191667	0.012	0.161	0.0449583	0.210089	0.760366
ASV0007	Firmicutes	Bacilli	Staphylococcales	Gemellaceae	Gemella	NA	0.00017788	0.000133379	0.00439008	0.00272086	0.00535064	0.00375983	0.00132594	0.000626303	0.0327768	0.0104965	0.0212201	0.00822084	0.787	0.163	0.25	0.435989	0.506233	0.750783	0.621	0.189	0.957	0.372592	0.531851	0.936892	0.505	0.0775	0.125	0.468903	0.345022	0.535795	0.544	0.145	0.91	0.359687	0.430065	0.898074
ASV0008	Firmicutes	Bacilli	Mycoplasmatales	Mycoplasmataceae	Ureaplasma	NA	0.00795632	0.0034939	0.00472719	0.00385467	3.32901e-05	3.32901e-05	0.0224414	0.0111122	0.00915281	0.00379336	0.022741	0.0179561	0.113	0.675	0.972	0.127223	0.761054	0.911705	0.068	0.632	0.962	0.099924	0.688466	0.936892	0.95	0.407	0.799	0.639946	0.718729	0.780424	0.113	0.538	0.968	0.134126	0.625797	0.911694
ASV0009	Proteobacteria	Gammaproteobacteria	Enterobacterales	Pasteurellaceae	NA	NA	0.00829093	0.00756812	0.00307813	0.00187911	0.00213468	0.00112161	0.00384107	0.001324	0.03275	0.011623	0.0174664	0.00693275	0.00254522	0.229	0.592	0.0159526	0.558027	0.805463	0.00154531	0.151	0.414	0.0161635	0.462055	0.828532	0.68	0.196	0.896	0.558219	0.523543	0.809634	0.00109081	0.112	0.347	0.013433	0.3881	0.760366
ASV0010	Firmicutes	Bacilli	Mycoplasmatales	Mycoplasmataceae	Ureaplasma	NA	0.0167278	0.0108282	0.0137993	0.010507	0.0104074	0.00904892	0.0363951	0.0111996	0.00238774	0.00139889	0.00559321	0.00204176	0.616	0.436	0.218	0.365915	0.663868	0.723082	0.7	0.311	0.78	0.40508	0.58175	0.901671	0.38	0.586	0.106	0.391676	0.746705	0.535795	0.622	0.248	0.687	0.378258	0.508213	0.825412
ASV0012	Firmicutes	Bacilli	Lactobacillales	Streptococcaceae	Lactococcus	lactis	0.00779292	0.00763986	0.0251775	0.0147114	0.00436668	0.0027418	0.0176684	0.00736105	0.00102719	0.000750041	0.0269501	0.0120963	0.644	0.00784615	0.00188889	0.37791	0.149592	0.162152	0.452	0.00486364	0.00116279	0.308335	0.199301	0.103913	0.613	0.264	0.765	0.526529	0.587651	0.777564	0.571	0.0198333	0.0034	0.362925	0.22625	0.16588
ASV0013	Firmicutes	Bacilli	Lactobacillales	Streptococcaceae	Streptococcus	halotolerans	0	0	0	0	0.00023855	0.00023855	5.61293e-05	5.61293e-05	0.0440896	0.0194205	0.0145936	0.0069016	0.00436324	0.0113333	0.659	0.0191336	0.149592	0.805463	0.00254522	0.035	0.45	0.0191475	0.322181	0.828532	0.121	0.00561111	0.606	0.20561	0.128469	0.709443	0.00190892	0.0295	0.378	0.0156718	0.257341	0.760366
ASV0015	Proteobacteria	Gammaproteobacteria	Burkholderiales	Neisseriaceae	NA	NA	0.00261186	0.0022124	0.0189804	0.0179933	0.00150421	0.000634362	0.00330122	0.00174467	0.0303674	0.00957265	0.0170032	0.00637371	9.09008e-05	0.0148571	0.308	0.00125735	0.181019	0.771493	0.000272702	0.009	0.216	0.00711193	0.199301	0.828532	7.69172e-05	0.043	0.148	0.00158561	0.297641	0.550487	0.000181802	0.007	0.169	0.0089553	0.210089	0.760366
ASV0016	Firmicutes	Bacilli	Mycoplasmatales	Mycoplasmataceae	Mycoplasma	penetrans	0.000824266	0.000824266	0.00237389	0.00157018	0.00356083	0.00356083	0.0121138	0.00993446	0.0389248	0.0160365	0.00539943	0.00356821	0.788	0.00972727	0.345	0.435989	0.149592	0.771493	0.626	0.0161429	0.226	0.373302	0.237551	0.828532	0.913	0.00416667	0.75	0.639503	0.115749	0.777564	0.564	0.0118889	0.188	0.362925	0.210089	0.760366
ASV0017	Firmicutes	Bacilli	Lactobacillales	Streptococcaceae	Streptococcus	NA	0.00471997	0.00380796	0.000466994	0.000466994	0.00683812	0.00524719	0.0121497	0.0110468	0.0145749	0.00769832	0.0278548	0.0155342	0.763	0.466	0.743	0.427037	0.663868	0.805463	0.58	0.348	0.57	0.352316	0.599379	0.828532	0.934	0.245	0.636	0.639503	0.577437	0.716393	0.544	0.27	0.457	0.359687	0.508213	0.760366
ASV0018	Firmicutes	Clostridia	Clostridiales	Clostridiaceae	Clostridium sensu stricto 1	NA	0	0	0	0	0	0	0	0	0	0	0.0588235	0.0588235	0.537	0.91	0.338	0.335451	0.787632	0.771493	0.393	0.776	0.224	0.281258	0.755683	0.828532	0.539	0.815	0.262	0.489331	0.791745	0.616606	0.332	0.809	0.293	0.259868	0.709901	0.760366
ASV0020	Campylobacterota	Campylobacteria	Campylobacterales	Campylobacteraceae	Campylobacter	NA	0.000234962	0.000234962	0	0	0.000469925	0.000264441	0.000400818	0.000400818	0.0128124	0.00376965	0.0453616	0.0318786	9.09008e-05	0.000374984	0.0246	0.00125735	0.0296972	0.422359	0.00127261	0.0085	0.133	0.0161635	0.199301	0.828532	7.69172e-05	0.000181813	0.00954545	0.00158561	0.0145694	0.368839	0.000909008	0.0064375	0.105	0.013433	0.210089	0.689039
ASV0022	Firmicutes	Clostridia	Clostridiales	Clostridiaceae	Clostridium sensu stricto 1	butyricum	0.00595994	0.00465015	0.0115848	0.00679046	0.00437297	0.00221891	0.005321	0.00351688	0.0369877	0.0120397	0.00877914	0.00294938	0.36	0.281	0.34	0.260127	0.6097	0.771493	0.246	0.195	0.235	0.212905	0.531851	0.828532	0.599	0.435	0.419	0.526529	0.718729	0.658034	0.207	0.162	0.195	0.19422	0.458376	0.760366
ASV0023	Proteobacteria	Gammaproteobacteria	Enterobacterales	Enterobacteriaceae	Escherichia-Shigella	NA	0.00735024	0.00612324	0.00312385	0.00312385	0.0319735	0.0302237	0.0204942	0.00947733	0.0191971	0.0105786	0.00415072	0.00230908	0.69	0.391	0.757	0.397039	0.663868	0.805463	0.542	0.276	0.832	0.350549	0.570291	0.917923	0.455	0.797	0.526	0.439669	0.791745	0.67845	0.467	0.272	0.754	0.325385	0.508213	0.87019
ASV0024	Bacteroidota	Bacteroidia	Bacteroidales	Porphyromonadaceae	Porphyromonas	cangingivalis	0.000749906	0.000556145	0	0	0.0031871	0.00152076	0.00615364	0.0042167	0.0400979	0.0159709	0.0111824	0.00404019	9.09008e-05	0.000874964	0.1005	0.00125735	0.0346468	0.666952	0.00554495	0.0162857	0.18	0.0278293	0.237551	0.828532	7.69172e-05	0.000333323	0.0505	0.00158561	0.0178071	0.450198	0.00418144	0.01275	0.14	0.0216813	0.210089	0.760366
ASV0025	Firmicutes	Bacilli	Lactobacillales	Lactobacillaceae	Leuconostoc	citreum	0.00995316	0.00709015	0.0102691	0.00525144	0.00428423	0.0020808	0.0193815	0.00576101	0.0179022	0.0100053	0.0128904	0.00546016	0.164	0.822	0.212	0.165409	0.767735	0.723082	0.103	0.945	0.134	0.127509	0.796612	0.828532	0.952	0.553	0.368	0.639946	0.746705	0.658034	0.118	0.857	0.104	0.136765	0.732116	0.689039
ASV0026	Firmicutes	Bacilli	Lactobacillales	Streptococcaceae	Streptococcus	gallolyticus	0.000246966	0.000176404	0.000458651	0.000458651	0.00596246	0.00510169	0.00078448	0.000410233	0.028951	0.00973882	0.0267346	0.0141128	0.000909008	0.711	0.165	0.00800133	0.761054	0.723082	0.06	0.52	0.472	0.0916856	0.674302	0.828532	0.000461503	0.444	0.0895	0.00713524	0.726114	0.535795	0.04	0.435	0.389	0.0716489	0.591832	0.760366
ASV0027	Firmicutes	Clostridia	Clostridiales	Clostridiaceae	Clostridium sensu stricto 1	butyricum	0.028525	0.0193996	0.00246132	0.00179301	0.016526	0.016526	0.029024	0.0183822	0.0124411	0.00936121	0.000589476	0.000307597	0.824	0.846	0.128	0.450755	0.771022	0.691532	0.727	0.755	0.112	0.4175	0.755058	0.828532	0.712	0.825	0.127	0.568162	0.791745	0.535795	0.743	0.643	0.0775	0.411227	0.647569	0.689039
ASV0029	Patescibacteria	Saccharimonadia	Saccharimonadales	NA	NA	NA	0.0267729	0.0173618	0.023208	0.020206	0.00626854	0.00398548	0.0317593	0.0120561	0.0018831	0.0018831	0.0053284	0.00338097	0.229	0.635	0.434	0.206201	0.761054	0.798957	0.83	0.481	0.587	0.446002	0.665721	0.828532	0.138	0.486	0.273	0.207139	0.746705	0.616606	0.775	0.563	0.779	0.421828	0.625797	0.87019
ASV0030	Firmicutes	Bacilli	Lactobacillales	Lactobacillaceae	Weissella	NA	0.0162538	0.0145201	0.072484	0.0326055	0.0084334	0.00515077	0.0126425	0.00426764	0.00275536	0.00136898	0.00912993	0.0042759	0.00263612	0.654	0.172	0.0159526	0.761054	0.723082	0.00154531	0.976	0.251	0.0161635	0.804742	0.828532	0.968	0.413	0.0825	0.643705	0.718729	0.535795	0.01275	0.945	0.227	0.036944	0.772419	0.760366
ASV0031	Proteobacteria	Gammaproteobacteria	Enterobacterales	Pasteurellaceae	Actinobacillus	NA	0	0	0	0	0	0	0	0	0.0352552	0.0236419	0.0235684	0.0147043	0.292	0.777	0.283	0.231745	0.761054	0.757	0.549	0.773	0.214	0.350549	0.755683	0.828532	0.163	0.526	0.283	0.226528	0.746705	0.616606	0.467	0.66	0.194	0.325385	0.648191	0.760366
ASV0032	Firmicutes	Bacilli	Lactobacillales	Lactobacillaceae	Fructobacillus	NA	0.0162903	0.0105308	0.00230275	0.00159167	0.0074346	0.00406016	0.0224176	0.0131095	0.0183446	0.0056421	0.00887508	0.00413696	0.00299973	0.862	0.258	0.016625	0.77576	0.750783	0.00181802	0.731	0.657	0.0161635	0.744862	0.848647	0.99	0.7	0.126	0.651331	0.758026	0.535795	0.00281793	0.655	0.559	0.0185076	0.647569	0.760366
ASV0035	Proteobacteria	Gammaproteobacteria	Burkholderiales	Neisseriaceae	NA	NA	0.01771	0.0112047	0.0305864	0.0205766	0.0153592	0.00972307	0.0150974	0.00647654	0.00456325	0.00422441	0.0166962	0.00891703	0.00309063	0.122	0.44	0.016625	0.449391	0.798957	0.00954545	0.24	0.336	0.037341	0.544756	0.828532	0.00123067	0.0615	0.264	0.013838	0.31052	0.616606	0.00727207	0.195	0.283	0.0311489	0.458798	0.760366
ASV0037	Proteobacteria	Gammaproteobacteria	Enterobacterales	Erwiniaceae	Tatumella	NA	0.0899617	0.084359	0.0509569	0.0495132	0.00161795	0.00130418	0.0054249	0.00535357	0.000233329	0.000162792	0.00285828	0.00261479	0.803	0.401	0.529	0.441764	0.663868	0.805463	0.661	0.298	0.403	0.387093	0.570291	0.828532	0.851	0.67	0.565	0.630215	0.747182	0.700507	0.584	0.28	0.335	0.366459	0.508213	0.760366
ASV0041	Bacteroidota	Bacteroidia	Flavobacteriales	Weeksellaceae	Bergeyella	NA	0	0	0	0	0.0119974	0.0119974	0.0403983	0.0349938	0.0141909	0.0108537	0	0	9.09008e-05	0.0373333	0.127	0.00125735	0.311226	0.691532	0.000363603	0.03325	0.152	0.00711193	0.322181	0.828532	7.69172e-05	0.02	0.063	0.00158561	0.212356	0.503807	0.000272702	0.022	0.121	0.0089553	0.23304	0.718739
ASV0042	Proteobacteria	Gammaproteobacteria	Enterobacterales	Enterobacteriaceae	Escherichia-Shigella	NA	0.0292421	0.0160176	0.000609422	0.000585383	0.0397851	0.0187499	0.0148125	0.00802389	0.00775399	0.00627639	0.0116794	0.00626893	0.073	0.57	0.181	0.0981512	0.734011	0.723082	0.0545	0.465	0.138	0.084603	0.655277	0.828532	0.493	0.676	0.934	0.464763	0.747182	0.82532	0.117	0.527	0.438	0.136765	0.625797	0.760366
ASV0045	Proteobacteria	Gammaproteobacteria	Enterobacterales	Enterobacteriaceae	Escherichia-Shigella	coli	0.0026922	0.00169982	0.00243233	0.0018445	0.0127645	0.00935955	0.0012877	0.000725393	0.03592	0.0236623	0.015302	0.00664081	0.11	0.979	0.187	0.127223	0.832616	0.723082	0.12	0.961	0.191	0.139711	0.796612	0.828532	0.096	0.984	0.161	0.182676	0.843966	0.579334	0.113	0.985	0.175	0.134126	0.776988	0.760366
ASV0046	Firmicutes	Bacilli	Lactobacillales	Streptococcaceae	Streptococcus	NA	0.0143281	0.00565355	0.00764634	0.00477407	0.001294	0.001294	0.0409041	0.0224444	0.00506527	0.00168502	0.00464178	0.00169724	0.314	0.437	0.243	0.239394	0.663868	0.750783	0.224	0.327	0.163	0.20284	0.589406	0.828532	0.641	0.498	0.787	0.543037	0.746705	0.780424	0.456	0.263	0.214	0.325385	0.508213	0.760366
ASV0048	Proteobacteria	Gammaproteobacteria	Enterobacterales	Enterobacteriaceae	Enterobacter	hormaechei	0.00181834	0.00106532	0.0202679	0.0192231	0.00150789	0.00103896	0.0152459	0.0120636	0.00768556	0.00384735	0.0275647	0.0157871	0.301	0.41	0.758	0.236945	0.663868	0.805463	0.221	0.787	0.694	0.201994	0.757729	0.860598	0.154	0.233	0.495	0.21894	0.565796	0.666636	0.173	0.685	0.63	0.178563	0.655382	0.793401
ASV0050	Firmicutes	Clostridia	Clostridiales	Clostridiaceae	Clostridium sensu stricto 1	NA	0.062472	0.0584631	0	0	0.0174406	0.0072361	0.0198322	0.0106564	0.00205843	0.00148719	0.00872853	0.00491173	0.115	0.352	0.336	0.127987	0.657792	0.771493	0.089	0.263	0.408	0.116054	0.568377	0.828532	0.087	0.614	0.186	0.181541	0.746705	0.616606	0.0655	0.302	0.501	0.0948953	0.508213	0.760366
ASV0051	Firmicutes	Bacilli	Lactobacillales	Enterococcaceae	Enterococcus	faecium	0.00234578	0.00152327	0.00457524	0.00439176	0.0472064	0.0472064	0.00536439	0.00216874	0.000581598	0.000581598	0.0337738	0.0206255	0.00454504	0.22	0.0218	0.0191336	0.544472	0.415873	0.00309063	0.148	0.013875	0.0201505	0.462055	0.413313	0.026	0.576	0.043	0.0862554	0.746705	0.449828	0.00181802	0.119	0.00909091	0.0156718	0.3881	0.3132
ASV0053	Firmicutes	Bacilli	Lactobacillales	Streptococcaceae	Streptococcus	parasanguinis	0.00278871	0.00150048	0.00574147	0.00386132	0.0308946	0.0188189	0.00376332	0.00122697	0.0247993	0.0156995	0.0163463	0.00740497	0.0565	0.983	0.422	0.081162	0.832616	0.798957	0.0755	0.953	0.321	0.103996	0.796612	0.828532	0.02875	0.825	0.609	0.0911796	0.791745	0.709443	0.0565	0.898	0.24	0.0869723	0.748156	0.760366
ASV0054	Firmicutes	Bacilli	Lactobacillales	Enterococcaceae	Enterococcus	NA	0	0	0	0	0	0	0	0	0.0180995	0.0180995	0.040724	0.040724	0.0416667	0.753	0.657	0.0677774	0.761054	0.805463	0.026	0.587	0.629	0.0551414	0.688466	0.838965	0.0256	0.84	0.382	0.0862554	0.7966	0.658034	0.0186667	0.668	0.854	0.0448534	0.648441	0.898074
ASV0056	Firmicutes	Bacilli	Lactobacillales	Lactobacillaceae	Fructobacillus	tropaeoli	0.0127884	0.0106564	0.0286873	0.0185375	0.0036932	0.00241172	0.0294382	0.010823	0.00769584	0.00663891	0.00574756	0.00243917	0.0406667	0.945	0.355	0.0677774	0.809083	0.771548	0.026	0.941	0.895	0.0551414	0.796612	0.924644	0.03025	0.749	0.202	0.0935383	0.784582	0.616606	0.055	0.968	0.821	0.0869723	0.772419	0.894675
ASV0057	Actinobacteriota	Actinobacteria	Corynebacteriales	Corynebacteriaceae	NA	NA	0.000346981	0.000346981	0.00104094	0.00104094	0.000925283	0.000925283	0.000244928	0.000244928	0.0284933	0.0197066	0.0292689	0.0150202	9.09008e-05	0.00254156	0.0155714	0.00125735	0.0805125	0.381924	0.00599945	0.02625	0.313	0.0278293	0.318967	0.828532	7.69172e-05	0.000818157	0.006375	0.00158561	0.0327812	0.368839	0.00372693	0.0196667	0.252	0.0203982	0.22625	0.760366
ASV0059	Proteobacteria	Gammaproteobacteria	Enterobacterales	Erwiniaceae	Tatumella	NA	0.0215599	0.0155021	0.0024428	0.00114231	0.00534363	0.00384069	0.041153	0.0207858	0.000892957	0.000664915	0.00642005	0.00214892	0.02975	0.609	0.27	0.0587865	0.748985	0.757	0.019	0.478	0.432	0.0493279	0.665721	0.828532	0.144	0.427	0.163	0.212035	0.718729	0.579334	0.0214	0.403	0.367	0.0490295	0.591832	0.760366
ASV0060	Firmicutes	Clostridia	Clostridiales	Clostridiaceae	Clostridium sensu stricto 1	NA	0	0	0	0	0.159495	0.149093	0	0	0	0	0.00253134	0.00253134	0.0865	0.741	0.732	0.110202	0.761054	0.805463	0.195	0.842	0.645	0.190706	0.758931	0.848647	0.049	0.521	0.519	0.131754	0.746705	0.674864	0.153	0.732	0.544	0.163839	0.670088	0.760366
ASV0061	Patescibacteria	Saccharimonadia	Saccharimonadales	NA	NA	NA	0.0120773	0.00686518	0.001999	0.000941601	0.0142012	0.011738	0.00917188	0.00281046	0.0298968	0.0115266	0.00977452	0.00340069	0.484	0.173	0.145	0.315004	0.507441	0.691532	0.347	0.601	0.0885	0.256628	0.688466	0.828532	0.597	0.085	0.261	0.526529	0.358495	0.616606	0.271	0.501	0.068	0.227926	0.625797	0.689039
ASV0063	Proteobacteria	Gammaproteobacteria	Enterobacterales	NA	NA	NA	0.0093633	0.0093633	0	0	0.0406878	0.0197897	0.0256564	0.0178753	0.0101995	0.0056327	0.00530253	0.00401665	0.0515	0.193	0.217	0.0779138	0.518129	0.723082	0.0406667	0.137	0.316	0.0696189	0.462055	0.828532	0.131	0.537	0.134	0.207139	0.746705	0.535795	0.072	0.119	0.26	0.0999049	0.3881	0.760366
ASV0064	Firmicutes	Bacilli	Lactobacillales	Lactobacillaceae	Fructobacillus	NA	0	0	0	0	0.0968254	0.0968254	0	0	0.0151261	0.0151261	0.00952381	0.00952381	0.118	0.995	0.325	0.128375	0.838297	0.771493	0.546	0.961	0.229	0.350549	0.796612	0.828532	0.0635	0.892	0.395	0.145447	0.821606	0.658034	0.462	0.974	0.182	0.325385	0.772419	0.760366
ASV0065	Firmicutes	Bacilli	Staphylococcales	Staphylococcaceae	Staphylococcus	aureus	0.0684461	0.0684461	0	0	0	0	0	0	0.0206216	0.0206216	0.0140445	0.0140445	0.00490864	0.0775	0.258	0.0197153	0.429325	0.750783	0.0285	0.05	0.387	0.0567228	0.422407	0.828532	0.0022306	0.0575	0.139	0.0183931	0.31052	0.542232	0.0224	0.0413333	0.312	0.0501543	0.306483	0.760366
ASV0067	Firmicutes	Bacilli	Lactobacillales	Streptococcaceae	Streptococcus	NA	0.0183837	0.014852	0.00423327	0.00106514	0.00796329	0.00608598	0.0416048	0.0138561	0.0011702	0.000900558	0.00525546	0.00159742	0.00263612	0.187	0.02	0.0159526	0.518129	0.415873	0.00181802	0.218	0.196	0.0161635	0.53639	0.828532	0.00176909	0.0915	0.00815385	0.0182345	0.371354	0.368839	0.00109081	0.174	0.168	0.013433	0.458798	0.760366
ASV0068	Firmicutes	Bacilli	Lactobacillales	Lactobacillaceae	Leuconostoc	pseudomesenteroides	0	0	0.00236505	0.00236505	0.00125209	0.00102232	0	0	0.0411961	0.0152012	0.0163508	0.00965649	9.09008e-05	0.718	0.00505	0.00125735	0.761054	0.21676	9.09008e-05	0.589	0.231	0.00711193	0.688466	0.828532	0.159	0.602	0.00212766	0.22348	0.746705	0.340295	0.000454504	0.728	0.18	0.0089553	0.670088	0.760366
ASV0069	Proteobacteria	Gammaproteobacteria	Enterobacterales	NA	NA	NA	0	0	0	0	0	0	0	0	0.0588235	0.0588235	0	0	0.924	0.807	0.243	0.483601	0.767735	0.750783	0.807	0.654	0.175	0.44091	0.689645	0.828532	0.9	0.633	0.496	0.639503	0.747182	0.666636	0.766	0.541	0.13	0.419246	0.625797	0.746459
ASV0070	Firmicutes	Bacilli	Lactobacillales	Streptococcaceae	Lactococcus	garvieae	0.033133	0.0209555	0.0311039	0.0199315	0.00914368	0.0061555	0.0266152	0.0107206	0.00111501	0.00111501	0.00519431	0.00210638	0.0196667	0.06	0.357	0.0464445	0.413196	0.771548	0.128	0.155	0.246	0.14556	0.462055	0.828532	0.00769172	0.0278	0.941	0.0408326	0.247526	0.826936	0.0935	0.123	0.511	0.119628	0.3881	0.760366
ASV0071	Proteobacteria	Alphaproteobacteria	Acetobacterales	Acetobacteraceae	Gluconobacter	cerinus	0.00212404	0.00111318	0	0	0.00580572	0.00483321	0.00304863	0.0010832	0.0454795	0.0279698	0.00749663	0.00579739	0.254	0.364	0.128	0.212013	0.663868	0.691532	0.187	0.264	0.0785	0.185717	0.568377	0.825313	0.529	0.475	0.423	0.48467	0.746348	0.658034	0.145	0.305	0.102	0.159817	0.508213	0.689039
ASV0072	Firmicutes	Bacilli	Lactobacillales	Lactobacillaceae	Leuconostoc	mesenteroides	0.0127413	0.00912755	0.070399	0.0665828	0.0014157	0.0014157	0.0251647	0.0103506	0.00127186	0.000754804	0.00254372	0.00142443	0.157	0.784	0.101	0.160016	0.761054	0.666952	0.112	0.886	0.0725	0.136917	0.775935	0.825313	0.087	0.521	0.225	0.181541	0.746705	0.616606	0.105	0.838	0.049	0.130941	0.723385	0.689039
ASV0073	Actinobacteriota	Actinobacteria	Corynebacteriales	Corynebacteriaceae	Corynebacterium	NA	0.0118302	0.00606667	0.00278358	0.00239048	0.00974252	0.00487126	0.0155962	0.00714976	0.0262802	0.0122166	0.00835073	0.005145	0.278	0.12	0.675	0.226196	0.449391	0.805463	0.217	0.1065	0.564	0.200209	0.422407	0.828532	0.647	0.115	0.865	0.544391	0.392146	0.804238	0.314	0.0775	0.561	0.251499	0.343204	0.760366
ASV0075	Campylobacterota	Campylobacteria	Campylobacterales	Arcobacteraceae	Arcobacter	NA	0.0228672	0.0228672	0	0	0.0237467	0.0237467	0.0102437	0.0102437	0.0321279	0.0220456	0	0	0.056	0.469	0.452	0.081162	0.663868	0.798957	0.464	0.319	0.692	0.312954	0.58175	0.860598	0.02525	0.334	0.255	0.0862554	0.66086	0.616606	0.414	0.255	0.863	0.30212	0.508213	0.898074
ASV0077	Proteobacteria	Gammaproteobacteria	Enterobacterales	Enterobacteriaceae	NA	NA	0.00680898	0.00499138	0.00852656	0.00564328	0.00533677	0.00343133	0.0217151	0.00807185	0.0120591	0.00411308	0.0177531	0.00820079	0.085	0.749	0.787	0.109735	0.761054	0.828961	0.289	0.843	0.893	0.2352	0.758931	0.924644	0.044	0.471	0.532	0.120938	0.746348	0.6807	0.224	0.918	0.797	0.202458	0.760546	0.880071
ASV0078	Proteobacteria	Gammaproteobacteria	Enterobacterales	Enterobacteriaceae	Citrobacter	freundii	0.0960784	0.0848592	0.00294118	0.00294118	0.0676471	0.0462117	0	0	0	0	0	0	0.999	0.905	0.76	0.514511	0.787608	0.805463	0.984	0.941	0.596	0.511879	0.796612	0.828532	0.939	0.7	0.798	0.639503	0.758026	0.780424	0.945	0.955	0.612	0.495731	0.772419	0.793401
ASV0080	Firmicutes	Bacilli	Lactobacillales	Streptococcaceae	Streptococcus	halotolerans	0	0	0	0	0	0	0	0	0.0588235	0.0588235	0	0	0.602	0.887	0.894	0.361001	0.776208	0.882135	0.863	0.818	0.884	0.456214	0.758931	0.924644	0.449	0.8	0.741	0.437287	0.791745	0.777564	0.803	0.714	0.995	0.432292	0.665943	0.911694
ASV0081	Patescibacteria	Saccharimonadia	Saccharimonadales	NA	NA	NA	0	0	0	0	0	0	0	0	0.0443111	0.0219999	0.0145124	0.00711386	0.0333333	0.197	1	0.0632842	0.520053	0.913248	0.0265	0.421	0.997	0.0551414	0.6275	0.94784	0.112	0.12	0.962	0.20372	0.400671	0.836202	0.02725	0.359	0.99	0.0571191	0.559558	0.911694
ASV0082	Bacteroidota	Bacteroidia	Flavobacteriales	Weeksellaceae	NA	NA	0	0	0.0143678	0.0143678	0.0100575	0.0100575	0.0413286	0.0283976	0	0	0.00887424	0.00887424	0.184	0.382	0.706	0.179411	0.663868	0.805463	0.14	0.608	0.694	0.155588	0.688466	0.860598	0.125	0.229	0.504	0.20561	0.564638	0.671743	0.11	0.519	0.613	0.134126	0.625797	0.793401
ASV0084	Proteobacteria	Gammaproteobacteria	Enterobacterales	Enterobacteriaceae	Enterobacter	hormaechei	0.0024966	0.0015849	0.0489988	0.0479773	0.00247138	0.00247138	0.0282502	0.0209809	0.00605235	0.00564979	0.00547382	0.00274885	0.173	0.847	0.608	0.172688	0.771022	0.805463	0.299	0.961	0.475	0.237397	0.796612	0.828532	0.091	0.611	0.849	0.181541	0.746705	0.798753	0.242	0.869	0.543	0.213747	0.732222	0.760366
ASV0085	Proteobacteria	Gammaproteobacteria	Enterobacterales	Pasteurellaceae	NA	NA	0.00831919	0.00527046	0.000339559	0.000231963	0.0458404	0.0205145	0.00331569	0.00180326	0.0244482	0.0194673	0.0118246	0.00418628	0.535	0.103	0.557	0.335451	0.429325	0.805463	0.418	0.081	0.658	0.291997	0.422407	0.848647	0.606	0.11	0.37	0.526529	0.392146	0.658034	0.408	0.064	0.565	0.299963	0.343204	0.760366
ASV0086	Firmicutes	Bacilli	Lactobacillales	Streptococcaceae	Streptococcus	NA	0.0101538	0.0066007	0.0232821	0.0219503	0.0269744	0.0206861	0.00289593	0.00232408	0.0293213	0.0182023	0.00528507	0.0021344	0.195	0.322	0.49	0.183309	0.637527	0.802858	0.13	0.436	0.62	0.146135	0.637596	0.838965	0.404	0.172	0.276	0.409587	0.492253	0.616606	0.223	0.352	0.525	0.202458	0.559558	0.760366
ASV0088	Firmicutes	Bacilli	Lactobacillales	Lactobacillaceae	Fructobacillus	NA	0.0297894	0.0195604	0.00291046	0.00138241	0.00838897	0.00618706	0.024472	0.0154325	0.018067	0.00568416	0.00178253	0.000979984	0.553	0.411	0.38	0.341046	0.663868	0.779678	0.511	0.822	0.262	0.335401	0.758931	0.828532	0.334	0.224	0.319	0.35309	0.560939	0.626584	0.505	0.964	0.21	0.343112	0.772419	0.760366
ASV0089	Proteobacteria	Gammaproteobacteria	Enterobacterales	Enterobacteriaceae	Klebsiella	variicola	0	0	0	0	0.0138889	0.0138889	0.0392157	0.0392157	0.00490196	0.00490196	0.00980392	0.00980392	0.358	0.503	0.241	0.260127	0.68682	0.750783	0.26	0.368	0.416	0.219202	0.612297	0.828532	0.194	0.794	0.129	0.255186	0.791745	0.535795	0.486	0.416	0.333	0.332496	0.591832	0.760366
ASV0091	Proteobacteria	Gammaproteobacteria	Enterobacterales	Erwiniaceae	Tatumella	punctata	0.0119734	0.00521492	0.00475413	0.00217374	0.037889	0.0166069	0.00955346	0.00373096	0.0113387	0.00429774	0.0186549	0.00502443	0.01375	0.351	0.339	0.0403437	0.657792	0.771493	0.0114444	0.29	0.29	0.0397304	0.570291	0.828532	0.0208	0.363	0.416	0.0779603	0.676482	0.658034	0.00936364	0.268	0.291	0.0349577	0.508213	0.760366
ASV0092	Bacteroidota	Bacteroidia	Flavobacteriales	Weeksellaceae	Bergeyella	NA	0.000542182	0.000542182	0.00878334	0.00442468	0.00303622	0.00303622	0.0213173	0.00840349	0.0240346	0.0105753	0.00910865	0.00395205	9.09008e-05	0.0433333	0.639	0.00125735	0.316784	0.805463	0.0144286	0.122	0.547	0.0407492	0.439801	0.828532	7.69172e-05	0.0212	0.413	0.00158561	0.212356	0.658034	0.0106	0.1045	0.476	0.0349577	0.3881	0.760366
ASV0093	Firmicutes	Bacilli	Lactobacillales	Aerococcaceae	Aerococcus	urinaeequi	0.0112153	0.00540178	0.0148924	0.0115022	0.00119507	0.000905392	0.0232309	0.00939732	0.0137893	0.00487319	0.012167	0.0049791	0.249	0.312	0.918	0.209647	0.627553	0.90064	0.326	0.214	0.809	0.253033	0.53639	0.902532	0.138	0.17	0.718	0.207139	0.492253	0.765574	0.265	0.169	0.861	0.227018	0.458376	0.898074
ASV0094	Proteobacteria	Gammaproteobacteria	Enterobacterales	Erwiniaceae	Tatumella	NA	0.0154038	0.00974222	0.00784266	0.00784266	0.0219394	0.00758962	0.0058057	0.00321054	0.0204903	0.00501904	0.0165796	0.00453842	0.0161429	0.39	0.19	0.0411324	0.663868	0.723082	0.0124444	0.276	0.405	0.0397304	0.570291	0.828532	0.081	0.432	0.114	0.178904	0.718729	0.535795	0.00927273	0.229	0.344	0.0349577	0.508213	0.760366
ASV0096	Firmicutes	Bacilli	Lactobacillales	Enterococcaceae	Enterococcus	faecalis	0.00468076	0.00468076	0	0	0	0	0.0108032	0.00716923	0.0201771	0.00995537	0.0261912	0.0137041	0.015	0.529	0.637	0.0403437	0.698244	0.805463	0.0218	0.46	0.552	0.052477	0.654178	0.828532	0.00699946	0.317	0.379	0.0408326	0.635063	0.658034	0.0162857	0.395	0.451	0.0422217	0.591832	0.760366
ASV0097	Proteobacteria	Gammaproteobacteria	Enterobacterales	Enterobacteriaceae	Escherichia-Shigella	NA	0.0108558	0.0104161	0.00249089	0.00117389	0.0171388	0.0111161	0.00635079	0.00352308	0.0336697	0.0308209	0.00804346	0.00506025	0.851	0.0945	0.596	0.457767	0.429325	0.805463	0.73	0.093	0.66	0.4175	0.422407	0.848647	0.771	0.0515	0.429	0.590949	0.297641	0.658034	0.761	0.0735	0.597	0.418836	0.343204	0.793401
ASV0098	Actinobacteriota	Actinobacteria	Corynebacteriales	Corynebacteriaceae	Corynebacterium	NA	0.0028202	0.00165742	0.00302655	0.00262089	0.000722245	0.000490502	0.0457624	0.0398835	0.00752592	0.00257933	0.00321672	0.00141005	0.705	0.044	0.975	0.400889	0.316784	0.911705	0.771	0.087	0.916	0.43087	0.422407	0.935525	0.461	0.0196667	0.871	0.442013	0.212356	0.804238	0.707	0.062	0.889	0.407092	0.343204	0.898074
ASV0099	Proteobacteria	Gammaproteobacteria	Enterobacterales	Erwiniaceae	Tatumella	NA	0	0	0	0	0	0	0	0	0	0	0.0588235	0.0588235	0.0356667	0.426	0.362	0.0651589	0.663868	0.771548	0.0242	0.653	0.51	0.0551414	0.689645	0.828532	0.261	0.264	0.224	0.307451	0.587651	0.616606	0.043	0.546	0.437	0.0754723	0.625797	0.760366
ASV0102	Bacteroidota	Bacteroidia	Flavobacteriales	Weeksellaceae	Bergeyella	NA	0.0131178	0.0107606	0.0218629	0.0101392	0.0506406	0.0348372	0.007824	0.00308421	0.00552704	0.00416199	0.0152532	0.0120438	0.0121111	0.0214	0.0333333	0.0366455	0.242113	0.457842	0.02625	0.015	0.128	0.0551414	0.237551	0.828532	0.00576879	0.0152857	0.01375	0.0375539	0.212356	0.368839	0.0171667	0.0111111	0.081	0.0433644	0.210089	0.689039
ASV0103	Firmicutes	Bacilli	Lactobacillales	Streptococcaceae	Streptococcus	NA	0	0	0	0	0	0	0.0588235	0.0588235	0	0	0	0	0.0543333	0.208	0.386	0.0809357	0.531379	0.779678	0.0353333	0.152	0.301	0.0628278	0.462055	0.828532	0.099	0.148	0.214	0.185531	0.471378	0.616606	0.037	0.108	0.229	0.0675026	0.3881	0.760366
ASV0110	Actinobacteriota	Actinobacteria	Micrococcales	Dermabacteraceae	Brachybacterium	NA	0	0	0	0	0	0	0	0	0.0588235	0.0588235	0	0	0.559	0.248	0.989	0.342564	0.576999	0.911705	0.851	0.206	0.993	0.452316	0.53639	0.94784	0.419	0.569	0.929	0.414599	0.746705	0.82532	0.79	0.325	0.991	0.42763	0.529636	0.911694
ASV0111	Firmicutes	Bacilli	Mycoplasmatales	Mycoplasmataceae	Mycoplasma	penetrans	0.0117866	0.00842394	0.00279156	0.00176736	0.0168528	0.00629261	0.0137206	0.0060632	0.00704277	0.00489531	0.0269669	0.0228002	0.886	0.00024999	0.625	0.468781	0.0296972	0.805463	0.766	0.068	0.462	0.430536	0.422407	0.828532	0.889	9.09063e-05	0.879	0.639503	0.0145694	0.804238	0.716	0.0535	0.488	0.407092	0.330581	0.760366
ASV0112	Proteobacteria	Gammaproteobacteria	Pseudomonadales	Moraxellaceae	Acinetobacter	NA	0.00983607	0.00580292	0.0196721	0.00564291	0.0107468	0.00588223	0.027151	0.00797399	0.00724312	0.00318645	0.0102218	0.00401914	0.2	0.52	0.693	0.186202	0.694794	0.805463	0.255	0.378	0.496	0.216856	0.612297	0.828532	0.0945	0.373	0.483	0.182676	0.679319	0.666636	0.335	0.3	0.465	0.259868	0.508213	0.760366
ASV0113	Actinobacteriota	Actinobacteria	Micrococcales	Micrococcaceae	Kocuria	carniphila	0.00136612	0.00136612	0	0	0.00136612	0.00136612	0.0417068	0.0406936	0.0142237	0.00990337	0.00192864	0.00192864	0.604	0.451	0.597	0.361001	0.663868	0.805463	0.485	0.844	0.468	0.324877	0.758931	0.828532	0.613	0.252	0.459	0.526529	0.585328	0.666636	0.396	0.838	0.371	0.29333	0.723385	0.760366
ASV0114	Proteobacteria	Gammaproteobacteria	Enterobacterales	Enterobacteriaceae	NA	NA	0.0303143	0.0231997	0	0	0.0154665	0.0074939	0.0127953	0.0063874	0.00707454	0.00486407	0.0227958	0.0150057	0.101	0.788	0.218	0.123123	0.761054	0.723082	0.12	0.644	0.144	0.139711	0.688466	0.828532	0.052	0.749	0.807	0.135283	0.784582	0.780424	0.0795	0.538	0.109	0.107289	0.625797	0.689039
ASV0115	Proteobacteria	Gammaproteobacteria	Enterobacterales	Enterobacteriaceae	Citrobacter	NA	0.000607386	0.000385423	0	0	0.000728863	0.000728863	0.00157206	0.000641485	0.0567799	0.0456956	0	0	0.11	0.456	0.516	0.127223	0.663868	0.805463	0.0805	0.338	0.381	0.109344	0.590438	0.828532	0.0895	0.88	0.327	0.181541	0.817091	0.626584	0.06	0.431	0.311	0.0895612	0.591832	0.760366
ASV0116	Proteobacteria	Gammaproteobacteria	Burkholderiales	Neisseriaceae	Alysiella	NA	0.0186782	0.0186782	0	0	0.0431034	0.0431034	0.00760649	0.00617954	0.0182556	0.0128437	0.0111562	0.0111562	0.0515	0.343	0.337	0.0779138	0.657792	0.771493	0.0413333	0.296	0.277	0.0696189	0.570291	0.828532	0.041	0.587	0.241	0.116191	0.746705	0.616606	0.03075	0.365	0.234	0.0598831	0.559558	0.760366
ASV0120	Proteobacteria	Gammaproteobacteria	Enterobacterales	Enterobacteriaceae	Klebsiella	pneumoniae	0.000900901	0.000900901	0	0	0.00213964	0.00213964	0.000397456	0.000397456	0.050159	0.0300572	0.00719396	0.00320184	0.351	0.522	0.219	0.257466	0.694794	0.723082	0.239	0.388	0.312	0.208694	0.612297	0.828532	0.221	0.431	0.115	0.278927	0.718729	0.535795	0.602	0.573	0.25	0.373003	0.625797	0.760366
ASV0123	Proteobacteria	Gammaproteobacteria	Enterobacterales	Enterobacteriaceae	Klebsiella	NA	0	0	0.00641026	0.00641026	0.0516591	0.0364266	0	0	0	0	0.0383285	0.0329557	0.103	0.657	0.219	0.123123	0.761054	0.723082	0.207	0.504	0.469	0.200209	0.669966	0.828532	0.0525	0.663	0.115	0.135283	0.747182	0.535795	0.167	0.424	0.421	0.175025	0.591832	0.760366
ASV0125	Proteobacteria	Gammaproteobacteria	Enterobacterales	Pasteurellaceae	NA	NA	0	0	0	0	0	0	0.0226244	0.0183802	0.0169683	0.0147385	0.0192308	0.0123402	0.1015	0.706	0.863	0.123123	0.761054	0.867437	0.0705	0.549	0.844	0.099924	0.677414	0.924644	0.127	0.516	0.639	0.20561	0.746705	0.716393	0.0525	0.542	0.783	0.0869723	0.625797	0.87019
ASV0126	Firmicutes	Bacilli	Lactobacillales	Aerococcaceae	Aerococcus	NA	0.00756082	0.00756082	0	0	0.0364892	0.0364892	0.0164752	0.00909216	0	0	0.0268013	0.013949	0.021	0.031	0.311	0.0470921	0.288832	0.771493	0.0191667	0.054	0.294	0.0493279	0.422407	0.828532	0.0114444	0.017	0.186	0.0544434	0.212356	0.616606	0.0147143	0.0376667	0.227	0.040267	0.306483	0.760366
ASV0130	Proteobacteria	Gammaproteobacteria	Enterobacterales	Enterobacteriaceae	NA	NA	0.0394703	0.0324761	0.0120155	0.00622975	0.0146641	0.00625735	0.00711354	0.0020854	0.00542636	0.00361862	0.0229366	0.00953491	0.027	0.343	0.467	0.0556228	0.657792	0.798957	0.0202	0.246	0.486	0.0506543	0.544756	0.828532	0.062	0.211	0.271	0.145447	0.544404	0.616606	0.0157143	0.192	0.385	0.0418413	0.458798	0.760366
ASV0132	Proteobacteria	Gammaproteobacteria	Enterobacterales	Erwiniaceae	Tatumella	punctata	0.00156662	0.00099235	0	0	0.0294453	0.0219635	0.00340551	0.00235574	0.0381643	0.0241271	0.00630836	0.00316986	0.042	0.036	0.013625	0.0677774	0.311226	0.381924	0.0336667	0.029	0.0104	0.0615765	0.321096	0.371759	0.0413333	0.0473333	0.02975	0.116191	0.297641	0.43412	0.0234	0.025	0.0111	0.051229	0.238667	0.318681
ASV0137	Proteobacteria	Gammaproteobacteria	Enterobacterales	Enterobacteriaceae	Citrobacter	freundii	0	0	0	0	0	0	0	0	0.0588235	0.0398444	0	0	0.01425	0.881	0.553	0.0403437	0.776208	0.805463	0.561	0.952	0.412	0.351697	0.796612	0.828532	0.00684563	0.665	0.739	0.0408326	0.747182	0.777564	0.469	0.866	0.361	0.325385	0.732222	0.760366
ASV0138	Firmicutes	Bacilli	Staphylococcales	Staphylococcaceae	Corticicoccus	populi	0	0	0	0	0	0	0.00776915	0.005609	0.00266371	0.00266371	0.0483907	0.0356884	0.591	0.111	0.878	0.357647	0.439537	0.871355	0.498	0.0955	0.866	0.331316	0.422407	0.924644	0.75	0.0595	0.704	0.590862	0.31052	0.76079	0.612	0.0665	0.928	0.376829	0.343204	0.898074
ASV0140	Firmicutes	Bacilli	Lactobacillales	Enterococcaceae	Enterococcus	NA	0	0	0	0	0	0	0.0336134	0.0336134	0	0	0.0252101	0.0252101	0.111	0.699	0.279	0.127223	0.761054	0.757	0.086	0.555	0.491	0.113657	0.677414	0.828532	0.0955	0.919	0.145	0.182676	0.826412	0.550487	0.0615	0.471	0.411	0.0904301	0.623647	0.760366
ASV0141	Proteobacteria	Gammaproteobacteria	Enterobacterales	Enterobacteriaceae	NA	NA	0.00984097	0.00820742	0.0109432	0.0065843	0.0314124	0.0256345	0.000389008	0.000389008	0.0400122	0.0400122	0	0	0.0206	0.313	0.74	0.0470921	0.627553	0.805463	0.267	0.768	0.598	0.22318	0.755683	0.828532	0.00769172	0.19	0.6	0.0408326	0.521551	0.709443	0.207	0.669	0.519	0.19422	0.648441	0.760366
ASV0144	Firmicutes	Bacilli	Staphylococcales	Staphylococcaceae	Staphylococcus	xylosus	0	0	0	0	0.00192678	0.00192678	0	0	0.0581435	0.0437664	0	0	0.00772657	0.824	0.551	0.0283603	0.767735	0.805463	0.00590855	0.721	0.689	0.0278293	0.744862	0.860598	0.0154286	0.947	0.39	0.0677334	0.829367	0.658034	0.00490864	0.882	0.613	0.0230279	0.738977	0.793401
ASV0151	Firmicutes	Bacilli	Lactobacillales	Lactobacillaceae	Leuconostoc	fallax	0.0306667	0.029096	0.00222222	0.00144701	0.0226667	0.0206071	0.0296471	0.0192973	0.00831373	0.00831373	0.0012549	0.000889081	0.0214	0.311	0.18	0.0470921	0.627553	0.723082	0.015	0.78	0.295	0.0407492	0.755683	0.828532	0.259	0.163	0.0865	0.307451	0.492253	0.535795	0.0116667	0.652	0.23	0.0351611	0.647569	0.760366
ASV0152	Firmicutes	Bacilli	Lactobacillales	Lactobacillaceae	Weissella	viridescens	0	0	0	0	0.000110668	0.000110668	0.0586868	0.0523271	0	0	9.76486e-05	9.76486e-05	0.288	0.353	0.74	0.230459	0.657792	0.805463	0.216	0.29	0.627	0.200209	0.570291	0.838965	0.318	0.19	0.486	0.348075	0.521551	0.666636	0.15	0.235	0.557	0.162391	0.508213	0.760366
ASV0153	Firmicutes	Bacilli	Lactobacillales	Lactobacillaceae	Lactiplantibacillus	NA	0.0273665	0.0190354	0.0333782	0.0241918	0.00542844	0.00542844	0.0321273	0.0114545	0.00174175	0.00174175	0.00159924	0.00159924	0.019	0.448	0.553	0.0459918	0.663868	0.805463	0.0121111	0.315	0.398	0.0397304	0.58175	0.828532	0.091	0.454	0.315	0.181541	0.734968	0.626584	0.00836288	0.241	0.336	0.0343287	0.508213	0.760366
ASV0155	Proteobacteria	Gammaproteobacteria	Enterobacterales	Erwiniaceae	Tatumella	NA	0	0	0.0346188	0.0346188	0	0	0.00618652	0.00442411	0.0351085	0.01783	0.0053101	0.00493981	0.016	0.44	0.382	0.0411324	0.663868	0.779678	0.0113333	0.356	0.623	0.0397304	0.60642	0.838965	0.26	0.263	0.224	0.307451	0.587651	0.616606	0.0183333	0.292	0.534	0.0448534	0.508213	0.760366
ASV0159	Proteobacteria	Gammaproteobacteria	Burkholderiales	Comamonadaceae	Comamonas	NA	0.00622407	0.00406021	0.00128433	0.000948635	0.0217348	0.0127536	0.00383556	0.00304727	0.0139126	0.00606962	0.0307542	0.014583	0.341	0.664	0.734	0.253979	0.761054	0.805463	0.228	0.496	0.549	0.204568	0.669966	0.828532	0.695	0.938	0.773	0.560608	0.829367	0.777564	0.201	0.412	0.64	0.192252	0.591832	0.798096
ASV0161	Proteobacteria	Gammaproteobacteria	Enterobacterales	Enterobacteriaceae	NA	NA	0.034532	0.0219707	0.0301982	0.0265582	0.00355002	0.00232586	0.0312098	0.0128625	0.000634611	0.000634611	0.00288016	0.00237809	0.117	0.88	0.433	0.128375	0.776208	0.798957	0.272	0.778	0.333	0.223538	0.755683	0.828532	0.0575	0.805	0.493	0.14224	0.791745	0.666636	0.219	0.644	0.25	0.201638	0.647569	0.760366
ASV0164	Firmicutes	Bacilli	Lactobacillales	Enterococcaceae	Enterococcus	NA	0.00468165	0.00468165	0.00749064	0.00473749	0.00374532	0.00374532	0.0191672	0.0103552	0.0165235	0.00636314	0.0175149	0.0110683	0.333	0.605	0.615	0.249943	0.748985	0.805463	0.27	0.506	0.878	0.223538	0.669966	0.924644	0.941	0.51	0.423	0.639503	0.746705	0.658034	0.622	0.435	0.971	0.378258	0.591832	0.911694
ASV0172	Proteobacteria	Gammaproteobacteria	Enterobacterales	NA	NA	NA	0	0	0	0	0	0	0	0	0.0163976	0.0163976	0.0424259	0.0424259	0.448	0.119	0.638	0.298433	0.449391	0.805463	0.336	0.0825	0.523	0.25473	0.422407	0.828532	0.914	0.909	0.41	0.639503	0.826412	0.658034	0.667	0.079	0.56	0.388823	0.343204	0.760366
ASV0174	Firmicutes	Bacilli	Lactobacillales	Enterococcaceae	Enterococcus	NA	0.00143999	0.000993012	0.00557414	0.00319967	0.00195095	0.00195095	0.0466424	0.0306483	0.00473802	0.00208743	0.00427897	0.00181992	0.146	0.71	0.854	0.150388	0.761054	0.867437	0.1155	0.569	0.72	0.139453	0.688466	0.862876	0.913	0.754	0.615	0.639503	0.784691	0.709443	0.179	0.465	0.859	0.18095	0.621249	0.898074
ASV0176	Proteobacteria	Gammaproteobacteria	Burkholderiales	Alcaligenaceae	NA	NA	0.0238744	0.0171317	0.0163033	0.0123774	0.00514839	0.00328976	0.0342039	0.0149805	0.00172801	0.00172801	0.00689422	0.00368141	0.02825	0.685	0.554	0.0569855	0.761054	0.805463	0.022	0.522	0.478	0.052477	0.674302	0.828532	0.12	0.524	0.33	0.20561	0.746705	0.626584	0.01425	0.42	0.509	0.0401106	0.591832	0.760366
ASV0180	Proteobacteria	Gammaproteobacteria	Enterobacterales	Enterobacteriaceae	NA	NA	0.00756629	0.00377214	0.009857	0.00421004	0	0	0.0412573	0.0239012	0.00467942	0.001955	0.00673739	0.0027999	0.88	0.161	0.257	0.468164	0.506233	0.750783	0.812	0.334	0.367	0.441178	0.590438	0.828532	0.686	0.0935	0.133	0.558219	0.371354	0.535795	0.719	0.264	0.28	0.407092	0.508213	0.760366
ASV0183	Firmicutes	Bacilli	Lactobacillales	Lactobacillaceae	Weissella	NA	0	0	0	0	0	0	0	0	0.0588235	0.0588235	0	0	0.842	0.44	0.622	0.455996	0.663868	0.805463	0.737	0.339	0.494	0.419053	0.590438	0.828532	0.685	0.547	0.621	0.558219	0.746705	0.709443	0.636	0.296	0.399	0.382055	0.508213	0.760366
ASV0185	Firmicutes	Bacilli	Staphylococcales	Staphylococcaceae	Jeotgalicoccus	NA	0.0162455	0.00866927	0.0174489	0.00958172	0.000902527	0.000902527	0.0194309	0.0084417	0.0136972	0.00589201	0.0134848	0.00464377	0.652	0.61	0.47	0.379182	0.748985	0.798957	0.56	0.528	0.53	0.351697	0.676415	0.828532	0.787	0.779	0.333	0.597188	0.791745	0.626584	0.667	0.557	0.469	0.388823	0.625797	0.760366
ASV0195	Proteobacteria	Gammaproteobacteria	Pseudomonadales	Moraxellaceae	Acinetobacter	NA	0.0192102	0.0192102	0.00409107	0.00409107	0.00231234	0.00231234	0.0487162	0.0272017	0.000627786	0.000627786	0.00043945	0.00043945	0.439	0.15	0.993	0.297246	0.484873	0.911705	0.788	0.117	0.97	0.435394	0.431819	0.936892	0.286	0.242	0.912	0.321586	0.577437	0.819462	0.686	0.088	0.974	0.397546	0.362507	0.911694
ASV0196	Firmicutes	Bacilli	Lactobacillales	Carnobacteriaceae	Granulicatella	NA	0.0061082	0.00426296	0.0167248	0.00994513	0.00189063	0.00132176	0.0217123	0.00882771	0.0103685	0.00451863	0.0180166	0.0103842	0.488	0.297	0.415	0.315004	0.627553	0.798957	0.373	0.218	0.453	0.270212	0.53639	0.828532	0.508	0.203	0.237	0.468903	0.533352	0.616606	0.29	0.168	0.376	0.238083	0.458376	0.760366
ASV0203	Proteobacteria	Gammaproteobacteria	Enterobacterales	Enterobacteriaceae	NA	NA	0.00277778	0.00277778	0.0185185	0.00936971	0	0	0.0330065	0.0122336	0.0163399	0.00843444	0.00196078	0.00142448	0.414	0.837	0.0955	0.282292	0.771022	0.666952	0.522	0.879	0.126	0.340337	0.774178	0.828532	0.266	0.612	0.0506667	0.307484	0.746705	0.450198	0.439	0.749	0.083	0.318008	0.672702	0.689039
ASV0215	Firmicutes	Bacilli	Lactobacillales	Lactobacillaceae	Weissella	ghanensis	0	0	0.0037594	0.0037594	0	0	0.0322866	0.0322866	0.0252101	0.0252101	0	0	0.000272702	0.823	0.364	0.00330055	0.767735	0.771548	0.000181802	0.95	0.308	0.00711193	0.796612	0.828532	0.000923006	0.645	0.43	0.0114164	0.747182	0.658034	0.000181802	0.859	0.295	0.0089553	0.732116	0.760366
ASV0216	Proteobacteria	Gammaproteobacteria	Enterobacterales	Erwiniaceae	Tatumella	punctata	0	0	0.0026141	0.00244846	0.0118694	0.0118694	0.000448844	0.000448844	0.0249857	0.0114143	0.0282772	0.0170933	0.0103	0.000833299	0.000253964	0.0321708	0.0346468	0.0436033	0.00736297	0.000580626	0.000215907	0.0300035	0.090004	0.038589	0.0162857	0.00954545	0.0161429	0.0677334	0.191229	0.368839	0.011	0.00113636	0.000571418	0.0349577	0.168521	0.0984324
ASV0222	Firmicutes	Bacilli	Lactobacillales	Streptococcaceae	Streptococcus	NA	0	0	0	0	0	0	0	0	0	0	0.0588235	0.0588235	0.544	0.479	0.569	0.337646	0.663868	0.805463	0.566	0.388	0.457	0.352073	0.612297	0.828532	0.357	0.922	0.386	0.371061	0.826412	0.658034	0.478	0.456	0.377	0.32931	0.614763	0.760366
ASV0225	Proteobacteria	Gammaproteobacteria	Enterobacterales	Enterobacteriaceae	Cronobacter	dublinensis	0.0248482	0.0186768	0	0	0.048567	0.0313822	0.0126317	0.00647002	0.00343822	0.00185437	0.0168423	0.0103836	0.244	0.255	0.19	0.209647	0.576999	0.723082	0.188	0.199	0.141	0.185717	0.531851	0.828532	0.476	0.923	0.231	0.452885	0.826412	0.616606	0.243	0.292	0.108	0.213747	0.508213	0.689039
ASV0226	Proteobacteria	Gammaproteobacteria	Enterobacterales	Enterobacteriaceae	NA	NA	0.0104575	0.00643937	0.0143791	0.00666538	0.00239651	0.00239651	0.0338331	0.0250198	0.00153787	0.000905337	0.0138408	0.00905096	0.262	0.11	0.0785	0.216822	0.439537	0.639938	0.211	0.091	0.0615	0.200209	0.422407	0.825313	0.298	0.542	0.415	0.329096	0.746705	0.658034	0.273	0.194	0.166	0.227926	0.458798	0.760366
ASV0227	Proteobacteria	Alphaproteobacteria	Acetobacterales	Acetobacteraceae	Gluconobacter	frateurii	0	0	0	0	0	0	0.0296631	0.0277988	0.0148819	0.010687	0.0142785	0.0142785	0.00436324	0.886	0.95	0.0191336	0.776208	0.906145	0.00281793	0.798	0.874	0.0196848	0.758931	0.924644	0.109	0.737	0.971	0.201222	0.784582	0.839463	0.00272702	0.704	0.909	0.0185076	0.665943	0.898074
ASV0228	Firmicutes	Bacilli	Bacillales	Planococcaceae	Lysinibacillus	xylanilyticus	0.0346203	0.0229936	0.0169476	0.0124082	0.00471271	0.00303303	0.0341298	0.0167376	0.000447814	0.000447814	0.00438218	0.00271426	0.718	0.539	0.753	0.404188	0.705564	0.805463	0.57	0.395	0.796	0.352073	0.612297	0.902532	0.772	0.544	0.519	0.590949	0.746705	0.674864	0.633	0.559	0.814	0.382055	0.625797	0.893118
ASV0232	Fusobacteriota	Fusobacteriia	Fusobacteriales	Fusobacteriaceae	Fusobacterium	NA	0	0	0.00147362	0.00147362	0.0201886	0.0139397	0	0	0.0329745	0.0268623	0.0182036	0.0152933	0.000363603	0.0725	0.451	0.00391176	0.429325	0.798957	0.0144286	0.0545	0.389	0.0407492	0.422407	0.828532	0.000153834	0.0336667	0.292	0.00271819	0.282473	0.616606	0.0107	0.0393333	0.331	0.0349577	0.306483	0.760366
ASV0233	Firmicutes	Bacilli	Bacillales	Planococcaceae	Kurthia	NA	0.00158114	0.00103652	0.00280293	0.00200954	0	0	0.0540294	0.0379871	0.00175025	0.000961021	0.00149659	0.00060434	0.388	0.181	0.117	0.272232	0.511945	0.691532	0.301	0.227	0.389	0.237397	0.544756	0.828532	0.264	0.102	0.0575	0.307484	0.389223	0.484025	0.241	0.178	0.312	0.213747	0.458798	0.760366
ASV0244	Proteobacteria	Alphaproteobacteria	Acetobacterales	Acetobacteraceae	Gluconobacter	albidus	0	0	0.011194	0.011194	0	0	0.048727	0.0259946	0.00307287	0.00307287	0.00307287	0.00307287	0.00927273	0.471	0.157	0.0302211	0.663868	0.723082	0.00645396	0.729	0.711	0.0278293	0.744862	0.862876	0.0154286	0.299	0.0835	0.0677334	0.622341	0.535795	0.00481774	0.62	0.627	0.0230279	0.638506	0.793401
ASV0245	Firmicutes	Clostridia	Peptostreptococcales-Tissierellales	Peptostreptococcaceae	Paraclostridium	bifermentans	0.021637	0.0142907	0.00655292	0.00655292	0.0114985	0.0114985	0.0434631	0.0141744	0.00135277	0.00135277	0	0	0.239	0.57	0.823	0.209647	0.734011	0.856372	0.674	0.455	0.808	0.392356	0.653059	0.902532	0.138	0.652	0.611	0.207139	0.747182	0.709443	0.591	0.548	0.725	0.368505	0.625797	0.849581
ASV0247	Firmicutes	Bacilli	Lactobacillales	Vagococcaceae	Vagococcus	NA	0.00211252	0.00211252	0.000444741	0.000444741	0	0	0.000156967	0.000156967	0.057764	0.057764	0	0	0.248	0.691	0.731	0.209647	0.761054	0.805463	0.18	0.553	0.595	0.185301	0.677414	0.828532	0.941	0.69	0.766	0.639503	0.757433	0.777564	0.321	0.539	0.69	0.255033	0.625797	0.825412
ASV0249	Firmicutes	Bacilli	Lactobacillales	Lactobacillaceae	Weissella	ghanensis	0.00642034	0.00146961	0.00222746	0.00222746	0.0344602	0.0190444	0.00883278	0.00442649	0.0148446	0.0111962	0.0199316	0.0114673	0.0685	0.756	0.291	0.0934156	0.761054	0.757	0.0695	0.847	0.236	0.099924	0.758931	0.828532	0.041	0.562	0.248	0.116191	0.746705	0.616606	0.056	0.753	0.193	0.0869723	0.672702	0.760366
ASV0252	Proteobacteria	Gammaproteobacteria	Enterobacterales	Enterobacteriaceae	Escherichia-Shigella	NA	0.0206628	0.0142805	0.0562602	0.0252529	0.00579651	0.00579651	0.0254645	0.00904546	0.00267161	0.00267161	0.00149225	0.00149225	0.057	0.103	0.00746667	0.081162	0.429325	0.256391	0.04	0.0745	0.005	0.0696189	0.422407	0.223413	0.289	0.663	0.02825	0.322032	0.747182	0.43412	0.0436667	0.133	0.00385185	0.0754723	0.41091	0.16588
ASV0258	Firmicutes	Bacilli	Lactobacillales	Enterococcaceae	Enterococcus	NA	0.0235911	0.0235911	0	0	0.0677152	0.0386941	0.021047	0.0152555	0	0	0.00555084	0.00555084	0.12	0.482	0.485	0.1291	0.663868	0.802858	0.0925	0.377	0.74	0.11903	0.612297	0.870134	0.148	0.568	0.288	0.215361	0.746705	0.616606	0.0685	0.285	0.95	0.0964062	0.508213	0.911694
ASV0259	Firmicutes	Negativicutes	Veillonellales-Selenomonadales	Veillonellaceae	Veillonella	atypica	0.0226898	0.0158676	0.00742574	0.00742574	0.0668317	0.059075	0	0	0.0246069	0.0120656	0	0	0.00436324	0.129	0.0595	0.0191336	0.454057	0.540826	0.00499955	0.095	0.0675	0.0271636	0.422407	0.825313	0.0022306	0.0845	0.0325	0.0183931	0.358495	0.43412	0.00363603	0.0685	0.05	0.0203982	0.343204	0.689039
ASV0260	Firmicutes	Bacilli	Lactobacillales	Streptococcaceae	Streptococcus	NA	0	0	0	0	0.0331317	0.027099	0.0358432	0.0197128	0.00472825	0.00472825	0.00655854	0.00471717	0.502	0.0068	0.0285	0.320414	0.149592	0.444835	0.454	0.0353333	0.03525	0.308335	0.322181	0.667259	0.331	0.00433333	0.0145714	0.352935	0.115749	0.368839	0.381	0.02575	0.02525	0.284357	0.238667	0.543695
ASV0263	Proteobacteria	Gammaproteobacteria	Enterobacterales	Morganellaceae	Proteus	NA	0.000650724	0.000650724	0.000325362	0.000325362	0	0	0.0521345	0.0452281	0.00318663	0.0029235	0.00315792	0.0018944	0.03425	0.858	0.987	0.0637741	0.77576	0.911705	0.042	0.736	0.948	0.0696189	0.744862	0.936111	0.0188333	0.817	0.885	0.072795	0.791745	0.804238	0.03225	0.637	0.914	0.0608763	0.647569	0.898074
ASV0268	Proteobacteria	Gammaproteobacteria	Enterobacterales	Enterobacteriaceae	NA	NA	0	0	0.00736067	0.00736067	0.0467928	0.039706	0.00797922	0.00495926	0	0	0.0317313	0.0128124	0.022	0.763	0.138	0.0473366	0.761054	0.691532	0.015	0.636	0.109	0.0407492	0.688466	0.828532	0.0255	0.99	0.317	0.0862554	0.843966	0.626584	0.0117778	0.607	0.103	0.0351611	0.633923	0.689039
ASV0276	Proteobacteria	Alphaproteobacteria	Acetobacterales	Acetobacteraceae	Acetobacter	orientalis	0	0	0	0	0.0478548	0.0261227	0	0	0	0	0.0419336	0.0419336	0.00245432	0.838	0.369	0.0159526	0.771022	0.772608	0.00172712	0.71	0.437	0.0161635	0.738647	0.828532	0.00792308	0.859	0.194	0.0408326	0.809827	0.616606	0.00136351	0.649	0.342	0.013433	0.647569	0.760366
ASV0289	Proteobacteria	Gammaproteobacteria	Enterobacterales	Enterobacteriaceae	Citrobacter	NA	0.0143616	0.00729504	0.00784456	0.00626938	0.0109824	0.0109824	0.0236828	0.00981209	0.0131618	0.00453283	0.0102654	0.00316502	0.189	0.581	0.513	0.179411	0.736205	0.805463	0.154	0.544	0.578	0.163705	0.677414	0.828532	0.443	0.424	0.371	0.434868	0.718729	0.658034	0.18	0.484	0.559	0.18095	0.625797	0.760366
ASV0291	Proteobacteria	Gammaproteobacteria	Xanthomonadales	Xanthomonadaceae	Stenotrophomonas	NA	0	0	0	0	0	0	0	0	0	0	0.0588235	0.0588235	0.488	0.703	0.76	0.315004	0.761054	0.805463	0.347	0.541	0.585	0.256628	0.677414	0.828532	0.964	0.535	0.554	0.643705	0.746705	0.692235	0.512	0.586	0.517	0.343135	0.625797	0.760366
ASV0300	Proteobacteria	Gammaproteobacteria	Enterobacterales	Enterobacteriaceae	NA	NA	0	0	0	0	0	0	0.0588235	0.0588235	0	0	0	0	0.0625	0.201	0.0373333	0.0877037	0.521914	0.457842	0.0483333	0.155	0.02925	0.0762404	0.462055	0.653482	0.151	0.793	0.41	0.217171	0.791745	0.658034	0.0565	0.484	0.112	0.0869723	0.625797	0.689039
ASV0302	Firmicutes	Clostridia	Lachnospirales	Lachnospiraceae	Cellulosilyticum	NA	0	0	0.107303	0.0736355	0	0	0.0196299	0.0135334	0	0	0.00132188	0.00132188	0.955	0.763	0.459	0.497138	0.761054	0.798957	0.848	0.623	0.939	0.452316	0.688466	0.936111	0.874	0.88	0.261	0.635897	0.817091	0.616606	0.838	0.575	0.868	0.446257	0.625797	0.898074
ASV0307	Proteobacteria	Gammaproteobacteria	Enterobacterales	Erwiniaceae	Pantoea	agglomerans	0.0138134	0.0048568	0.00430254	0.00212428	0.00634058	0.00297503	0.034367	0.0181405	0.00939098	0.00254471	0.00643382	0.00151024	0.00936364	0.93	0.217	0.0302211	0.800567	0.723082	0.00654486	0.864	0.481	0.0278293	0.767973	0.828532	0.00918182	0.743	0.122	0.0454269	0.784582	0.535795	0.00536315	0.759	0.4	0.0240165	0.674002	0.760366
ASV0308	Firmicutes	Bacilli	Lactobacillales	Lactobacillaceae	Weissella	NA	0	0	0	0	0	0	0.0588235	0.0422778	0	0	0	0	0.864	0.586	0.408	0.462192	0.736648	0.798957	0.785	0.503	0.352	0.435394	0.669966	0.828532	0.726	0.954	0.278	0.57562	0.830957	0.616606	0.732	0.595	0.288	0.411227	0.625797	0.760366
ASV0311	Proteobacteria	Gammaproteobacteria	Enterobacterales	NA	NA	NA	0.00213675	0.00109487	0.00189934	0.00125629	0.00134536	0.0012528	0.0503882	0.0406846	0.00279314	0.00126476	0.00374281	0.00236608	0.383	0.383	0.727	0.271392	0.663868	0.805463	0.552	0.293	0.607	0.350549	0.570291	0.834532	0.243	0.607	0.617	0.297584	0.746705	0.709443	0.56	0.239	0.528	0.362925	0.508213	0.760366
ASV0315	Proteobacteria	Gammaproteobacteria	Enterobacterales	Enterobacteriaceae	NA	NA	0.00547731	0.00374171	0.00912885	0.00693322	0.00156495	0.00156495	0.0394919	0.0233212	0.00754856	0.00477703	0.00607567	0.00278554	0.376	0.821	0.975	0.269675	0.767735	0.911705	0.291	0.867	0.975	0.2352	0.767973	0.936892	0.24	0.577	0.84	0.296849	0.746705	0.798753	0.216	0.96	0.954	0.200752	0.772419	0.911694
ASV0328	Actinobacteriota	Actinobacteria	Corynebacteriales	Corynebacteriaceae	Corynebacterium	NA	0.0493827	0.0493827	0	0	0.0987654	0.0987654	0	0	0.00653595	0.00653595	0	0	0.0413333	0.192	0.732	0.0677774	0.518129	0.805463	0.034	0.584	0.646	0.0615765	0.688466	0.848647	0.0725	0.109	0.585	0.163042	0.392146	0.709443	0.0285	0.488	0.829	0.0584946	0.625797	0.894675
ASV0330	Proteobacteria	Gammaproteobacteria	Cardiobacteriales	Wohlfahrtiimonadaceae	Koukoulia	aurantiaca	0	0	0.103465	0.0404836	0.015239	0.0096452	0	0	0.00588801	0.00588801	0.01104	0.00512894	0.103	0.259	0.619	0.123123	0.577796	0.805463	0.07	0.181	0.465	0.099924	0.519577	0.828532	0.839	0.192	0.683	0.625141	0.521551	0.748207	0.111	0.143	0.623	0.134126	0.430065	0.793401
ASV0333	Firmicutes	Bacilli	Erysipelotrichales	Erysipelotrichaceae	Erysipelothrix	NA	0	0	0	0	0	0	0	0	0	0	0.0588235	0.0588235	0.208	0.776	0.7	0.190909	0.761054	0.805463	0.153	0.644	0.558	0.163705	0.688466	0.828532	0.604	0.987	0.644	0.526529	0.843966	0.716393	0.199	0.552	0.759	0.192205	0.625797	0.87019
ASV0352	Firmicutes	Bacilli	Lactobacillales	Streptococcaceae	Streptococcus	sanguinis	0.0010142	0.0010142	0	0	0.00912779	0.00729001	0	0	0.0441475	0.0199194	0.0110965	0.0039438	0.893	0.136	0.063	0.469916	0.465065	0.540826	0.818	0.106	0.552	0.441982	0.422407	0.828532	0.932	0.342	0.037	0.639503	0.664245	0.43412	0.901	0.123	0.485	0.477226	0.3881	0.760366
ASV0367	Firmicutes	Bacilli	Lactobacillales	Aerococcaceae	Facklamia	tabacinasalis	0.00175131	0.000783211	0.000291886	0.000291886	0.0183888	0.0107745	0.0216339	0.0136427	0.00999279	0.00775363	0.0199856	0.0115488	0.186	0.515	0.346	0.179411	0.694794	0.771493	0.143	0.417	0.672	0.157136	0.6275	0.857905	0.927	0.615	0.198	0.639503	0.746705	0.616606	0.354	0.549	0.655	0.26827	0.625797	0.800214
ASV0368	Proteobacteria	Gammaproteobacteria	Enterobacterales	Enterobacteriaceae	Buttiauxella	NA	0	0	0	0	0	0	0	0	0.0588235	0.0511708	0	0	0.00509045	0.254	0.0875	0.0197153	0.576999	0.653171	0.0433333	0.196	0.0615	0.0706319	0.531851	0.825313	0.00246135	0.65	0.47	0.0190273	0.747182	0.666636	0.0295	0.28	0.0865	0.0593114	0.508213	0.689039
ASV0371	Bacteroidota	Bacteroidia	Bacteroidales	Dysgonomonadaceae	Dysgonomonas	NA	0.0239521	0.0176851	0.00578842	0.00433368	0	0	0.0178936	0.00911749	0.0216978	0.00914487	0.00873547	0.00291326	0.271	0.373	0.611	0.222369	0.663868	0.805463	0.185	0.316	0.431	0.185717	0.58175	0.828532	0.698	0.214	0.545	0.560608	0.544404	0.687611	0.16	0.251	0.398	0.169492	0.508213	0.760366
ASV0377	Firmicutes	Bacilli	Lactobacillales	Streptococcaceae	Streptococcus	cristatus	0	0	0	0	0.017094	0.01468	0	0	0.000377074	0.000377074	0.0524133	0.0400141	0.0176667	0.1	0.14	0.0438608	0.429325	0.691532	0.012	0.101	0.102	0.0397304	0.422407	0.828532	0.213	0.062	0.0805	0.271601	0.31052	0.535795	0.031	0.0775	0.067	0.0598831	0.343204	0.689039
ASV0378	Proteobacteria	Gammaproteobacteria	Enterobacterales	Enterobacteriaceae	Kluyvera	georgiana	0	0	0	0	0	0	0	0	0.0441176	0.0441176	0.0147059	0.0147059	0.015	0.177	0.063	0.0403437	0.509734	0.540826	0.013	0.242	0.128	0.0397304	0.544756	0.828532	0.036	0.115	0.0343333	0.108603	0.392146	0.43412	0.0109	0.198	0.1035	0.0349577	0.458798	0.689039
ASV0382	Proteobacteria	Alphaproteobacteria	Acetobacterales	Acetobacteraceae	Acetobacter	NA	0.0967213	0.0967213	0	0	0	0	0.0138862	0.0138862	0	0	0.0108004	0.00781546	0.000545405	0.78	0.943	0.00528088	0.761054	0.906145	0.000363603	0.675	0.89	0.00711193	0.70698	0.924644	0.000692254	0.658	0.824	0.00951366	0.747182	0.789159	0.000363603	0.59	0.831	0.0089553	0.625797	0.894675
ASV0384	Actinobacteriota	Actinobacteria	Corynebacteriales	Corynebacteriaceae	Corynebacterium	NA	0	0	0	0	0	0	0	0	0	0	0.0588235	0.0588235	0.654	0.688	0.586	0.379182	0.761054	0.805463	0.576	0.61	0.85	0.352073	0.688466	0.924644	0.677	0.822	0.432	0.558219	0.791745	0.658034	0.548	0.683	0.78	0.359917	0.655382	0.87019
ASV0385	Firmicutes	Bacilli	Lactobacillales	Lactobacillaceae	Fructobacillus	NA	0	0	0	0	0	0	0.0588235	0.0588235	0	0	0	0	0.00372693	0.75	0.664	0.0189926	0.761054	0.805463	0.00381783	0.62	0.544	0.023336	0.688466	0.828532	0.00199985	0.768	0.621	0.0183931	0.791745	0.709443	0.00263612	0.595	0.484	0.0185076	0.625797	0.760366
ASV0388	Firmicutes	Bacilli	Lactobacillales	Lactobacillaceae	Leuconostoc	pseudomesenteroides	0	0	0	0	0.0410628	0.021122	0.0039784	0.0039784	0	0	0.0403524	0.0293735	0.0264	0.653	0.85	0.0555691	0.761054	0.867437	0.03125	0.845	0.865	0.0599252	0.758931	0.924644	0.0164286	0.492	0.695	0.0677334	0.746705	0.756173	0.0256	0.749	0.976	0.054827	0.672702	0.911694
ASV0392	Bacteroidota	Bacteroidia	Flavobacteriales	Flavobacteriaceae	Myroides	odoratimimus	0	0	0.166667	0.119511	0	0	0	0	0	0	0	0	0.311	0.0985	0.707	0.239394	0.429325	0.805463	0.213	0.268	0.525	0.200209	0.569085	0.828532	0.237	0.0505	0.681	0.296099	0.297641	0.748207	0.174	0.221	0.474	0.178563	0.504214	0.760366
ASV0402	Proteobacteria	Gammaproteobacteria	Enterobacterales	NA	NA	NA	0.00965327	0.00610717	0.0240347	0.0138275	0.0177305	0.00639464	0.0150883	0.00576455	0.00618829	0.00402705	0.0193992	0.0145343	0.0393333	0.1	0.141	0.0677774	0.429325	0.691532	0.029	0.078	0.108	0.0567228	0.422407	0.828532	0.77	0.919	0.282	0.590949	0.826412	0.616606	0.091	0.198	0.259	0.119534	0.458798	0.760366
ASV0410	Proteobacteria	Gammaproteobacteria	Enterobacterales	Morganellaceae	Proteus	NA	0	0	0	0	0	0	0	0	0.0320856	0.0320856	0.026738	0.026738	0.00254522	0.873	0.992	0.0159526	0.776208	0.911705	0.00199982	0.829	0.973	0.0162982	0.758931	0.936892	0.00284593	0.656	0.985	0.0207062	0.747182	0.843933	0.00136351	0.731	0.99	0.013433	0.670088	0.911694
ASV0412	Firmicutes	Bacilli	Lactobacillales	Streptococcaceae	Lactococcus	NA	0.00191571	0.00191571	0.00957854	0.00957854	0	0	0.00946586	0.00946586	0.00392157	0.00392157	0.0413793	0.0410928	0.1	0.101	0.289	0.123123	0.429325	0.757	0.187	0.0705	0.34	0.185717	0.422407	0.828532	0.057	0.0705	0.185	0.14224	0.322826	0.616606	0.146	0.051	0.29	0.159817	0.330581	0.760366
ASV0420	Actinobacteriota	Actinobacteria	Micrococcales	Micrococcaceae	Rothia	dentocariosa	0	0	0	0	0	0	0	0	0.0461709	0.0190186	0.0126526	0.0126526	0.189	0.71	0.863	0.179411	0.761054	0.867437	0.231	0.643	0.813	0.205376	0.688466	0.902532	0.136	0.99	0.961	0.207139	0.843966	0.836202	0.197	0.839	0.874	0.192157	0.723385	0.898074
ASV0423	Proteobacteria	Gammaproteobacteria	Enterobacterales	Morganellaceae	Providencia	NA	0	0	0	0	0	0	0.047703	0.047703	0.010756	0.010756	0.000364609	0.000364609	0.047	0.752	0.725	0.0733995	0.761054	0.805463	0.333	0.621	0.59	0.254428	0.688466	0.828532	0.0265	0.632	0.785	0.0862554	0.747182	0.780424	0.273	0.521	0.629	0.227926	0.625797	0.793401
ASV0441	Firmicutes	Clostridia	Lachnospirales	Lachnospiraceae	Anaerosporobacter	NA	0	0	0	0	0	0	0	0	0	0	0.0588235	0.0588235	0.414	0.477	0.558	0.282292	0.663868	0.805463	0.319	0.394	0.557	0.24958	0.612297	0.828532	0.863	0.276	0.356	0.631609	0.591924	0.658034	0.663	0.288	0.476	0.388823	0.508213	0.760366
ASV0444	Proteobacteria	Gammaproteobacteria	Enterobacterales	Enterobacteriaceae	Citrobacter	freundii	0	0	0	0	0	0	0	0	0.0464396	0.0325077	0.0123839	0.0123839	0.53	0.0835	0.461	0.335406	0.429325	0.798957	0.44	0.245	0.947	0.303036	0.544756	0.936111	0.774	0.048	0.322	0.590949	0.297641	0.626584	0.658	0.198	0.901	0.388823	0.458798	0.898074
ASV0458	Proteobacteria	Gammaproteobacteria	Enterobacterales	Erwiniaceae	Tatumella	NA	0.0014629	0.0014629	0	0	0	0	0.0572377	0.0560338	0.000663839	0.0004545	0.00040568	0.000279048	0.693	0.011	0.277	0.397039	0.149592	0.757	0.614	0.008	0.228	0.370666	0.199301	0.828532	0.907	0.0188333	0.291	0.639503	0.212356	0.616606	0.742	0.008	0.293	0.411227	0.210089	0.760366
ASV0460	Proteobacteria	Gammaproteobacteria	Pseudomonadales	Pseudomonadaceae	Pseudomonas	NA	0.0185553	0.0185553	0.0503645	0.0326539	0	0	0.0344989	0.0194775	0	0	0	0	0.329	0.709	0.677	0.24887	0.761054	0.805463	0.251	0.593	0.703	0.215327	0.688466	0.860598	0.542	0.739	0.464	0.489331	0.784582	0.666636	0.26	0.593	0.926	0.224689	0.625797	0.898074
ASV0469	Proteobacteria	Gammaproteobacteria	Cardiobacteriales	Wohlfahrtiimonadaceae	Wohlfahrtiimonas	NA	0	0	0	0	0	0	0	0	0.0588235	0.05562	0	0	0.177	0.169	0.713	0.174878	0.507441	0.805463	0.125	0.142	0.574	0.143821	0.462055	0.828532	0.202	0.095	0.992	0.260258	0.371354	0.843933	0.096	0.107	0.631	0.121252	0.3881	0.793401
ASV0491	Firmicutes	Negativicutes	Veillonellales-Selenomonadales	Veillonellaceae	Veillonella	parvula	0	0	0	0	0.166667	0.166667	0	0	0	0	0	0	0.135	0.0795	0.644	0.14208	0.429325	0.805463	0.1	0.109	0.504	0.125382	0.422407	0.828532	0.126	0.0426667	0.471	0.20561	0.297641	0.666636	0.076	0.081	0.427	0.10399	0.343204	0.760366
ASV0517	Proteobacteria	Gammaproteobacteria	Enterobacterales	Enterobacteriaceae	NA	NA	0	0	0.0169946	0.0169946	0.0193798	0.0193798	0.0272546	0.0167818	0.00505104	0.00505104	0.0136799	0.00940859	0.235	0.126	0.082	0.208751	0.453577	0.639938	0.176	0.51	0.466	0.183111	0.669966	0.828532	0.254	0.067	0.045	0.307451	0.315823	0.449828	0.141	0.401	0.393	0.157852	0.591832	0.760366
ASV0529	Proteobacteria	Gammaproteobacteria	Enterobacterales	NA	NA	NA	0	0	0	0	0	0	0.0588235	0.0588235	0	0	0	0	0.0815	0.304	0.928	0.106638	0.627553	0.904044	0.0615	0.24	0.858	0.0925319	0.544756	0.924644	0.0625	0.344	0.885	0.145447	0.664245	0.804238	0.0665	0.182	0.775	0.0949478	0.458798	0.87019
ASV0531	Firmicutes	Bacilli	Lactobacillales	Vagococcaceae	Vagococcus	NA	0.000420875	0.000420875	0	0	0	0	0	0	0.0508021	0.029702	0.00787285	0.00787285	0.644	0.138	0.932	0.37791	0.465065	0.904044	0.638	0.116	0.916	0.378152	0.431819	0.935525	0.496	0.112	0.81	0.464763	0.392146	0.780424	0.569	0.096	0.924	0.362925	0.384774	0.898074
ASV0534	Firmicutes	Clostridia	Peptostreptococcales-Tissierellales	Family XI	Parvimonas	NA	0	0	0	0	0.00626959	0.00566581	0.0459155	0.0367164	0.00700719	0.00414284	0.003688	0.00233158	0.00863558	0.094	0.207	0.0298621	0.429325	0.723082	0.012875	0.0705	0.228	0.0397304	0.422407	0.828532	0.0044612	0.066	0.126	0.0306551	0.315823	0.535795	0.0101	0.053	0.184	0.0349577	0.330581	0.760366
ASV0550	Proteobacteria	Gammaproteobacteria	Burkholderiales	Comamonadaceae	NA	NA	0	0	0	0	0	0	0	0	0.0588235	0.0588235	0	0	0.0333333	0.044	0.435	0.0632842	0.316784	0.798957	0.119	0.1	0.504	0.139711	0.422407	0.828532	0.0181667	0.0234	0.264	0.0724833	0.220605	0.616606	0.0925	0.0715	0.433	0.119628	0.343204	0.760366
ASV0558	Proteobacteria	Gammaproteobacteria	Enterobacterales	NA	NA	NA	0	0	0	0	0	0	0.0319473	0.017364	0.00963489	0.00963489	0.0172414	0.0172414	0.977	0.00830769	0.0585	0.505871	0.149592	0.540826	0.938	0.006	0.0483333	0.490559	0.199301	0.785329	0.986	0.0155714	0.038	0.651331	0.212356	0.43412	0.946	0.00452174	0.0366667	0.495731	0.210089	0.631619
ASV0566	Actinobacteriota	Actinobacteria	Micrococcales	Microbacteriaceae	NA	NA	0	0	0	0	0	0	0	0	0	0	0.0588235	0.0588235	0.402	0.459	0.721	0.278026	0.663868	0.805463	0.346	0.395	0.942	0.256628	0.612297	0.936111	0.757	0.372	0.546	0.590949	0.679319	0.687611	0.656	0.348	0.893	0.388823	0.559558	0.898074
ASV0571	Firmicutes	Clostridia	Lachnospirales	Lachnospiraceae	Cellulosilyticum	lentocellum	0	0	0	0	0	0	0.0116354	0.0116354	0.0252101	0.0101823	0.021978	0.0186328	0.445	0.431	0.869	0.298433	0.663868	0.867437	0.803	0.416	0.799	0.44091	0.6275	0.902532	0.331	0.309	0.992	0.352935	0.634909	0.843933	0.74	0.355	0.849	0.411227	0.559558	0.898074
ASV0572	Proteobacteria	Gammaproteobacteria	Enterobacterales	Enterobacteriaceae	NA	NA	0	0	0	0	0	0	0.0588235	0.0376318	0	0	0	0	0.209	0.238	0.119	0.190909	0.56501	0.691532	0.169	0.499	0.366	0.177719	0.669966	0.828532	0.169	0.15	0.071	0.229705	0.471378	0.535795	0.133	0.417	0.301	0.150607	0.591832	0.760366
ASV0576	Proteobacteria	Gammaproteobacteria	Enterobacterales	NA	NA	NA	0	0	0	0	0	0	0.0294797	0.0217186	0.0254042	0.0226012	0.00393968	0.00393968	0.113	0.084	0.278	0.127223	0.429325	0.757	0.0975	0.068	0.222	0.123835	0.422407	0.828532	0.125	0.934	0.306	0.20561	0.829367	0.626584	0.0835	0.251	0.462	0.111165	0.508213	0.760366
ASV0609	Firmicutes	Bacilli	Lactobacillales	Aerococcaceae	Aerosphaera	NA	0	0	0	0	0	0	0	0	0.000336134	0.000336134	0.0584874	0.0584874	0.039	0.759	0.864	0.0677774	0.761054	0.867437	0.0285	0.804	0.787	0.0567228	0.758931	0.901671	0.175	0.589	0.769	0.235274	0.746705	0.777564	0.0545	0.711	0.719	0.0869723	0.665943	0.849501
ASV0646	Patescibacteria	Saccharimonadia	Saccharimonadales	NA	NA	NA	0.0262467	0.0150318	0.00262467	0.00262467	0	0	0.036591	0.0187958	0.00741084	0.00402125	0.00463177	0.0033118	0.245	0.0735	0.729	0.209647	0.429325	0.805463	0.399	0.083	0.727	0.282764	0.422407	0.862876	0.169	0.05	0.578	0.229705	0.297641	0.709443	0.352	0.064	0.663	0.26827	0.343204	0.804284
ASV0669	Actinobacteriota	Actinobacteria	Corynebacteriales	Corynebacteriaceae	Corynebacterium	efficiens	0	0	0	0	0	0	0	0	0.0512821	0.0209743	0.00754148	0.00527903	0.588	0.428	0.81	0.357647	0.663868	0.847985	0.507	0.454	0.729	0.335024	0.653059	0.862876	0.819	0.282	0.803	0.613938	0.59468	0.780424	0.562	0.366	0.776	0.362925	0.559558	0.87019
ASV0704	Actinobacteriota	Actinobacteria	Micrococcales	Micrococcaceae	Rothia	NA	0	0	0	0	0.0606061	0.0606061	0	0	0	0	0.0374332	0.0374332	0.4	0.0695	0.734	0.278026	0.429325	0.805463	0.394	0.067	0.7	0.281258	0.422407	0.860598	0.338	0.052	0.715	0.35429	0.297641	0.765574	0.348	0.0535	0.644	0.267844	0.330581	0.798096
ASV0705	Actinobacteriota	Actinobacteria	Micrococcales	Microbacteriaceae	Leucobacter	NA	0	0	0	0	0	0	0	0	0	0	0.0588235	0.0467903	0.483	0.026	0.838	0.315004	0.257387	0.866728	0.426	0.02675	0.775	0.295475	0.318967	0.901671	0.585	0.0154286	0.878	0.524326	0.212356	0.804238	0.464	0.0186667	0.772	0.325385	0.22625	0.87019
ASV0735	Actinobacteriota	Actinobacteria	Actinomycetales	Actinomycetaceae	NA	NA	0	0	0	0	0	0	0	0	0.0462963	0.02806	0.0125272	0.00857681	0.144	0.461	0.608	0.149922	0.663868	0.805463	0.154	0.38	0.782	0.163705	0.612297	0.901671	0.0895	0.676	0.456	0.181541	0.747182	0.666636	0.12	0.581	0.72	0.137466	0.625797	0.849501
ASV0759	Firmicutes	Bacilli	Lactobacillales	Enterococcaceae	Enterococcus	NA	0	0	0	0	0	0	0	0	0	0	0.0588235	0.0588235	0.843	0.642	0.673	0.455996	0.761054	0.805463	0.755	0.893	0.593	0.426806	0.777672	0.828532	0.856	0.463	0.6	0.630215	0.742043	0.709443	0.711	0.781	0.504	0.407092	0.68941	0.760366
ASV0761	Firmicutes	Bacilli	Lactobacillales	NA	NA	NA	0.00277778	0.00277778	0	0	0	0	0.0558824	0.0558824	0.000326797	0.000326797	0.00163399	0.00103986	0.0446667	0.733	0.477	0.0708991	0.761054	0.802858	0.034	0.629	0.937	0.0615765	0.688466	0.936111	0.139	0.809	0.32	0.207139	0.791745	0.626584	0.0446667	0.751	0.899	0.0758696	0.672702	0.898074
ASV0852	Proteobacteria	Gammaproteobacteria	Enterobacterales	NA	NA	NA	0	0	0	0	0	0	0.0588235	0.0588235	0	0	0	0	0.45	0.239	0.053	0.298433	0.56501	0.540826	0.407	0.208	0.0765	0.286358	0.53639	0.825313	0.409	0.882	0.02975	0.409963	0.817091	0.43412	0.359	0.431	0.058	0.269983	0.591832	0.689039
ASV0876	Proteobacteria	Gammaproteobacteria	Enterobacterales	NA	NA	NA	0.0491968	0.0491968	0.0431727	0.0296924	0	0	0.0205528	0.0139286	0	0	0.00566974	0.0037418	0.23	0.795	0.621	0.206201	0.763161	0.805463	0.213	0.74	0.718	0.200209	0.744862	0.862876	0.186	0.83	0.512	0.247374	0.791802	0.674864	0.184	0.712	0.65	0.183103	0.665943	0.799778
ASV0925	Firmicutes	Bacilli	Lactobacillales	Carnobacteriaceae	Alkalibacterium	NA	0.00907029	0.00907029	0.0306122	0.0195393	0.00453515	0.00453515	0.0220088	0.0153176	0.0116046	0.00880352	0.00960384	0.00697703	0.281	0.269	0.446	0.226732	0.59177	0.798957	0.239	0.229	0.388	0.208694	0.544756	0.828532	0.401	0.172	0.293	0.409587	0.492253	0.616606	0.277	0.17	0.305	0.229322	0.458376	0.760366
ASV0968	Firmicutes	Clostridia	Lachnospirales	Lachnospiraceae	NA	NA	0	0	0	0	0.042029	0.042029	0	0	0.0168798	0.0168798	0.02711	0.02711	0.384	0.368	0.563	0.271392	0.663868	0.805463	0.349	0.632	0.575	0.256628	0.688466	0.828532	0.324	0.276	0.445	0.351532	0.591924	0.666636	0.334	0.556	0.512	0.259868	0.625797	0.760366
ASV1097	Firmicutes	Bacilli	Lactobacillales	Streptococcaceae	Streptococcus	NA	0	0	0	0	0	0	0	0	0.0588235	0.0588235	0	0	0.708	0.453	0.946	0.400889	0.663868	0.906145	0.65	0.403	0.94	0.382944	0.618513	0.936111	0.657	0.359	0.847	0.54907	0.676482	0.798753	0.583	0.32	0.88	0.366459	0.527282	0.898074
ASV1103	Firmicutes	Bacilli	Lactobacillales	Enterococcaceae	Enterococcus	faecalis	0	0	0	0	0.160494	0.160494	0	0	0	0	0.00217865	0.00217865	0.313	0.301	0.491	0.239394	0.627553	0.802858	0.298	0.283	0.469	0.237397	0.570291	0.828532	0.273	0.277	0.474	0.309785	0.591924	0.666636	0.251	0.238	0.414	0.21883	0.508213	0.760366
ASV1131	Actinobacteriota	Actinobacteria	Corynebacteriales	Corynebacteriaceae	Corynebacterium	NA	0	0	0	0	0	0	0.0470588	0.0395087	0	0	0.0117647	0.0117647	0.503	0.473	0.466	0.320414	0.663868	0.798957	0.576	0.436	0.428	0.352073	0.637596	0.828532	0.411	0.945	0.746	0.409963	0.829367	0.777564	0.51	0.619	0.541	0.343135	0.638506	0.760366
ASV1176	Firmicutes	Bacilli	Lactobacillales	Carnobacteriaceae	Alloiococcus	NA	0	0	0	0	0	0	0	0	0.0144284	0.0144284	0.0443951	0.0443951	0.305	0.171	0.543	0.238158	0.507441	0.805463	0.33	0.16	0.561	0.254121	0.46796	0.828532	0.272	0.172	0.495	0.309785	0.492253	0.666636	0.305	0.161	0.531	0.246293	0.458376	0.760366
ASV1325	Bacteroidota	Bacteroidia	Flavobacteriales	Weeksellaceae	NA	NA	0	0	0	0	0.166667	0.166667	0	0	0	0	0	0	0.074	0.143	0.449	0.0981512	0.471876	0.798957	0.073	0.14	0.43	0.101989	0.462055	0.828532	0.062	0.123	0.473	0.145447	0.402306	0.666636	0.058	0.114	0.375	0.0879077	0.3881	0.760366
